# Supplementary material for: Sociodemographic and psychological determinants of influenza vaccine intention among recipients of autologous and allogeneic haematopoietic stem cell transplant: a cross-sectional survey of UK transplant recipients using a modified health belief model
Source: PubMed Central journal article supplement — BMJ Open. 2018 Aug 8;8(8):e021222. doi: 10.1136/bmjopen-2017-021222 (PMC6089289; doi:10.1136/bmjopen-2017-021222), 2018-08-08
Supplement: bmjopen-2017-021222.draft_revisions.pdf [file bmjopen-2017-021222.draft_revisions.pdf]

# BMJ Open

BMJ Open is committed to open peer review. As part of this commitment we make the peer review history of every article we publish publicly available.

When an article is published we post the peer reviewers' comments and the authors' responses online. We also post the versions of the paper that were used during peer review. These are the versions that the peer review comments apply to.

The versions of the paper that follow are the versions that were submitted during the peer review process. They are not the versions of record or the final published versions. They should not be cited or distributed as the published version of this manuscript.

BMJ Open is an open access journal and the full, final, typeset and author-corrected version of record of the manuscript is available on our site with no access controls, subscription charges or pay-per-view fees (<http://bmjopen.bmj.com>).

If you have any questions on BMJ Open's open peer review process please email [info.bmjopen@bmj.com](mailto:info.bmjopen@bmj.com)

# BMJ Open

## Sociodemographic and psychological determinants of influenza vaccine intention amongst recipients of autologous and allogeneic haematopoietic stem cell transplant: a cross-sectional survey of UK transplant recipients using a modified health belief model.

|                               |                                                                                                                                                                                                                                                                                                                                                                                                                                                                                                                                                                                                                                                                                                                                                                                                                                                                                                                                                                                                                                                                                                  |
|-------------------------------|--------------------------------------------------------------------------------------------------------------------------------------------------------------------------------------------------------------------------------------------------------------------------------------------------------------------------------------------------------------------------------------------------------------------------------------------------------------------------------------------------------------------------------------------------------------------------------------------------------------------------------------------------------------------------------------------------------------------------------------------------------------------------------------------------------------------------------------------------------------------------------------------------------------------------------------------------------------------------------------------------------------------------------------------------------------------------------------------------|
| Journal:                      | <i>BMJ Open</i>                                                                                                                                                                                                                                                                                                                                                                                                                                                                                                                                                                                                                                                                                                                                                                                                                                                                                                                                                                                                                                                                                  |
| Manuscript ID                 | bmjopen-2017-021222                                                                                                                                                                                                                                                                                                                                                                                                                                                                                                                                                                                                                                                                                                                                                                                                                                                                                                                                                                                                                                                                              |
| Article Type:                 | Research                                                                                                                                                                                                                                                                                                                                                                                                                                                                                                                                                                                                                                                                                                                                                                                                                                                                                                                                                                                                                                                                                         |
| Date Submitted by the Author: | 29-Dec-2017                                                                                                                                                                                                                                                                                                                                                                                                                                                                                                                                                                                                                                                                                                                                                                                                                                                                                                                                                                                                                                                                                      |
| Complete List of Authors:     | Miller, Paul; Anthony Nolan Trust, Anthony Nolan Research Institute<br>Forster, Alice; UCL, Research Department of Behavioural Science and Health<br>de Silva, Thushan; Sheffield Teaching Hospitals NHS Foundation Trust, Department of Infection and Tropical Medicine<br>Leonard, Hayley; Anthony Nolan Trust, Anthony Nolan Research Institute<br>Anthias, Chloe; Anthony Nolan Trust, Anthony Nolan Research Institute;<br>Royal Marsden Hospital Sutton, Department of Haemato-Oncology<br>Mayhew, Michaela; St George's NHS Foundation Trust, Department of Haematology<br>Klammer, Matthias; St George's NHS Foundation Trust, Department of Haematology<br>Paskar, Susan; Freeman Hospital, Northern Centre for Cancer Care<br>Hurst, Erin; Freeman Hospital, Northern Centre for Cancer Care<br>Peggs, Karl; University College London Hospitals NHS Foundation Trust, Department of Clinical Haematology<br>Madrigal, Alejandro; Anthony Nolan Trust, Anthony Nolan Research Institute<br>Snowden, John; Sheffield Teaching Hospitals NHS Foundation Trust, Department of Haematology |
| Keywords:                     | haematopoietic stem cell transplant, Influenza, Inactivated influenza vaccine                                                                                                                                                                                                                                                                                                                                                                                                                                                                                                                                                                                                                                                                                                                                                                                                                                                                                                                                                                                                                    |
|                               |                                                                                                                                                                                                                                                                                                                                                                                                                                                                                                                                                                                                                                                                                                                                                                                                                                                                                                                                                                                                                                                                                                  |

SCHOLARONE™  
Manuscripts

1 Sociodemographic and psychological determinants of influenza vaccine intention  
2 amongst recipients of autologous and allogeneic haematopoietic stem cell  
3 transplant: a cross-sectional survey of UK transplant recipients using a modified  
4 health belief model.

5  
6 Paul D E Miller MRCP<sup>1\*</sup> pauldemiller@doctors.org.uk, Alice S Forster PhD<sup>2</sup>,  
7 Thushan I de Silva PhD<sup>3</sup>, Hayley Leonard BSc<sup>1</sup>, Chloe Anthias MD<sup>1,4</sup>, Michaela  
8 Mayhew MSc<sup>5</sup>, Matthias Klammer MD<sup>5</sup>, Susan Paskar BSc<sup>6</sup>, Erin Hurst FRCPath<sup>6</sup>,  
9 Karl Peggs PhD<sup>7</sup>, Alejandro Madrigal PhD<sup>1</sup>, John A Snowden MD<sup>8</sup>

10  
11 <sup>1</sup>Anthony Nolan Research Institute, Royal Free Hospital, Pond Street, London,  
12 NW3 2QU, United Kingdom, pauldemiller@doctors.org.uk, t 020 7284 8278

13 <sup>2</sup> Research Department of Behavioural Science and Health, University College  
14 London, London, United Kingdom

15 <sup>3</sup>Department of Infection and Tropical Medicine, Sheffield Teaching Hospitals  
16 NHS Foundation Trust, Sheffield, United Kingdom

17 <sup>4</sup>Department of Haemato-Oncology, Royal Marsden NHS Foundation Trust,  
18 London, United Kingdom

19 <sup>5</sup>Department of Haematology, St George's NHS Foundation Trust, London, United  
20 Kingdom

21 <sup>6</sup> Northern Centre for Cancer Care, Freeman Hospital, Newcastle upon Tyne,  
22 United Kingdom

23 <sup>7</sup>Department of Clinical Haematology, University College London Hospitals NHS  
24 Foundation Trust, London, United Kingdom

1  
2  
3 25 <sup>8</sup>Department of Clinical Haematology, Sheffield Teaching Hospitals NHS  
4 Foundation Trust, Sheffield  
5  
6

7 27

8  
9 28 \*Corresponding Author  
10

11 29  
12

13  
14 30 This work was supported by the Anthony Nolan Research Institute (No grant  
15 number).  
16 31

17  
18 32 Alice Forster is funded by Cancer Research UKC49896/A17429  
19

20 33  
21

22 34 The authors have no competing interests to declare  
23  
24

25 35  
26

27 36 Abstract  
28

29 37  
30

31 38 Objectives: Studies exploring vaccination rates amongst haematopoietic stem  
32 cell transplant (HSCT) recipients have focused on physician factors that limit  
33 uptake. Understanding the patient factors that determine vaccination intention  
34 is crucial to delivering a successful vaccination programme. Using a modified  
35 Health Belief Model (mHBM), we conducted a cross-sectional survey with the  
36 objective of exploring the sociodemographic and psychological factors that  
37 determined autologous and allogeneic HSCT recipients' intention to receive the  
38 seasonal inactivated influenza vaccine (SIIV) during the 2015-2016 influenza  
39 season.  
40  
41  
42  
43  
44  
45  
46  
47  
48  
49  
50  
51  
52

53 48  
54

55 49 Setting: The setting of our study was three tertiary-level, UK NHS autologous and  
56 allogeneic HSCT centres.  
57  
58  
59  
60

1  
2  
3 50

4  
5 51 Participants: Eligible patients were aged 16 years or over and recipients of  
6  
7 52 autologous or allogeneic HSCT for any disease indication, with no absolute  
8  
9 53 contraindication to receiving the SIIV during the next influenza season, and  
10  
11 54 having not received the SIIV since transplant. 93 participants from 3 UK NHS  
12  
13 55 HSCT centres completed an anonymous study-specific questionnaire. 78.5%  
14  
15 56 were recipients of allogeneic and 21.5% autologous HSCT.  
16  
17

18 57

19  
20 58 Results: 23.7% of participants expressed low intent to receive the SIIV. patients  
21  
22 59 aged over 65 (OR 0.02, 95% CI 0.01-0.57, p=0.02) and those who had not  
23  
24 60 received the SIIV prior to HSCT (OR 0.04, 0.02-0.56, p=0.02) were more likely to  
25  
26 61 have low intent. A multivariate logistic regression model incorporating  
27  
28 62 constructs of the mHBM was statistically significant (p<0.001) and explained  
29  
30 63 74.7% of variation in SIIV intention. More patients felt that a recommendation  
31  
32 64 from their HSCT team than their General Practitioner would prompt them to  
33  
34 65 receive the SIIV, and this was most pronounced in those who had low intent.  
35  
36 66

37  
38 66

39  
40 67 Conclusions: The mHBM may provide a useful structure for addressing low  
41  
42 68 vaccine intent amongst HSCT recipients and further interventional studies are  
43  
44 69 warranted. We would encourage HSCT and General practitioners to discuss SIIV  
45  
46 70 intention as a routine part of care.  
47  
48

49 71

50  
51 72 HRA REC reference 16/WM/0144  
52  
53 73

54  
55 74 Strengths of Study  
56  
57  
58  
59  
60

1  
2  
3 75

4  
5 76 -To our knowledge this is the first study to explore determinants of influenza  
6  
7 77 vaccine uptake in a population of haematopoietic stem cell transplant recipients  
8  
9 78 -Participants from 3 geographically dispersed study sites completed anonymous  
10  
11 79 questionnaires  
12  
13  
14 80 - The questionnaire was based on the established theoretical framework of the  
15  
16 81 Health Belief Model, and questions were specific with regard to vaccine and  
17  
18 82 2015-2016 season.  
19

20 83

21  
22 84 Limitations

23  
24  
25 85 -The study explored intention to receive the inactivated influenza vaccine during  
26  
27 86 the 2015-2016 influenza season. Uptake was not assessed and may differ from  
28  
29 87 intention rates.

30  
31 88 -The study did not include a qualitative component and there may be additional  
32  
33 89 determinants of influenza vaccine intention not captured here.  
34

35  
36 90

37  
38 91 Introduction

39  
40 92

41  
42 93 Innate and adaptive immune responses are impaired for months to years  
43  
44 94 following autologous and allogeneic haematopoietic stem cell transplant (HSCT).  
45  
46 95 HSCT recipients are at high risk of morbidity and mortality from influenza  
47  
48 96 viruses[1-3] and guidelines recommend that the seasonal inactivated influenza  
49  
50 97 vaccine (SIIV) is administered annually[4-6]. While the SIIV is recommended by  
51  
52 98 96% of UK NHS allogeneic HSCT programmes[7], uptake rates of only 60-70% in  
53  
54 99 the first 2 years post HSCT have been reported amongst UK HSCT recipients[8,9].  
55  
56  
57  
58  
59  
60

1  
2  
3 100 In both the UK and USA, physicians' familiarity with current guidelines, and  
4  
5 101 perception of graft-versus-host disease (GvHD) as a contraindication to  
6  
7 102 vaccination have been identified as factors limiting vaccine uptake rates[8–10].  
8  
9 103 No studies to-date have explored the patient factors that influence SIIV hesitancy  
10  
11 104 or intention in an HSCT recipient population.  
12

13  
14 105  
15  
16 106 The Health Belief Model (HBM) is a widely used framework for investigating  
17  
18 107 psychosocial determinants of health behaviours[11] and is recognized as an  
19  
20 108 important predictor of influenza vaccination uptake[12]. The HBM proposes  
21  
22 109 that an individual's engagement in a specific preventative health behaviour is  
23  
24 110 predicated on the following constructs: i) perceived susceptibility to the illness, ii)  
25  
26 111 perceived likelihood of contracting the illness, iii) perceived seriousness of the  
27  
28 112 illness, iv) perceived barriers to engaging in the health behaviour, v) perceived  
29  
30 113 benefits of the health behaviour, vi) cues to engage in the health behaviour such  
31  
32 114 as advice from a healthcare practitioner and, vii) self-efficacy or the individual's  
33  
34 115 perception of their capability to engage or succeed in the behaviour. Additional  
35  
36 116 emotional constructs may modify the HBM. In particular, worry may modify the  
37  
38 117 impact of perceived risk of illness; a patient may perceive themselves to be at  
39  
40 118 risk, but unless this is something that worries them they may not engage in a  
41  
42 119 preventative behaviour[13]. Furthermore, anticipated regret of illness if a health  
43  
44 120 behaviour is not performed is also recognized as a predictor of intent[14].  
45  
46

47 121  
48  
49  
50  
51 122 The objective of this study was to explore the sociodemographic factors, and the  
52  
53 123 vaccine and vaccination-specific health-beliefs that are associated with SIIV  
54  
55 124 intention amongst HSCT recipients, using a HBM modified with the additional  
56  
57  
58  
59  
60

1  
2  
3 125 emotional constructs given above (mHBM). A better understanding of such  
4  
5 126 associations may allow development of targeted strategies that address issues  
6  
7 127 specific to this unique and complex patient group, with the aim of increasing  
8  
9 128 influenza vaccine uptake rates.  
10

11  
12 129

## 13 14 130 Participants and Methods

15  
16 131

### 17 18 132 *Participants*

19  
20 133

21  
22 134 Patients were screened by HSCT nurse specialists for study eligibility during  
23  
24 135 routine outpatient appointments at 3 study sites in the United Kingdom between  
25  
26 136 June and September 2016. Eligible patients were aged 16 years or over and  
27  
28 137 recipients of autologous or allogeneic HSCT for any disease indication, with no  
29  
30 138 absolute contraindication to receiving the SIIV during the next influenza season,  
31  
32 139 and having not received the SIIV since transplant. All participants gave written  
33  
34 140 informed consent. The study was approved by the Health Research Authority  
35  
36 141 National Research Ethics Committee (Reference 16/WM/0144)

37  
38 142

### 39 40 143 *Study Questionnaire and Health Belief Model*

41  
42 144

43  
44 145 Participants completed a study-specific, anonymous, 42-item, paper-based  
45  
46 146 questionnaire.  
47

48  
49 147

50  
51 148 Questions scoped type of HSCT (autologous or allogeneic), disease indication,  
52  
53 149 time from HSCT, pre-HSCT SIIV receipt, and receipt of non-SIIV vaccines since  
54  
55  
56  
57  
58  
59



1  
2  
3 150 HSCT. Sociodemographic questions established age, gender, ethnic background,  
4  
5 151 educational attainment, relationship status and residential circumstances.

6  
7 152

8  
9 153 Intention to receive the SIIV during the 2016-2017 influenza season, was  
10  
11 154 assessed by 2 statements phrased in the affirmative (I intend to receive the flu  
12  
13 155 vaccine next winter) and negative (I will choose not to receive the flu vaccine  
14  
15 156 next winter). Participants' agreement with each statement was expressed on 5-  
16  
17 157 point Likert scales ranging from strongly disagree to strongly agree.

18  
19  
20 158

21  
22 159 24 health belief statements were mapped to the mHBM with between 2 and 5  
23  
24 160 statements clustered around each construct (Table 1). Statements pertaining to  
25  
26 161 the cues to vaccination construct were phrased to explore perception of HSCT  
27  
28 162 team and General Practitioner (GP) knowledge of SIIV in the context of HSCT.  
29  
30 163 Participants' perceived impact of a recommendation to receive the SIIV from  
31  
32 164 their HSCT team or GP was explored. Statements about preferred vaccination  
33  
34 165 location and ease of access to services were also included. Again, participants'  
35  
36 166 agreement with each statement was expressed on 5-point Likert scales ranging  
37  
38 167 from strongly disagree to strongly agree.

39  
40  
41  
42 168

43  
44 169 *Statistical Analysis*

45  
46  
47 170

48  
49 171 Statistical analysis was performed with IBM SPSS version 24.

50  
51 172

1  
2  
3 173 For the dependent variable vaccination intention, participants' agreement scores  
4  
5 174 were summed and dichotomised to a 'high intent' group (intention score > than  
6  
7 175 neutral value) and a 'low intent' group (intention score  $\leq$  to the neutral value).  
8

9  
10 176

11 177 Categorical patient characteristics and sociodemographic factors are reported as  
12  
13 178 frequencies and percentages. Associations between these variables and SIIV  
14  
15 179 intention was examined with Pearson's chi-squared test, and Fisher's exact test  
16  
17 180 when expected values were less than 5.  
18  
19

20  
21 181

22 182 Internal scale reliability for each cluster of mHBM construct statements was  
23  
24 183 assessed using Cronbach's  $\alpha$ . A value of  $>0.6$  was considered indicative of  
25  
26  
27  
28  
29  
30  
31  
32  
33  
34  
35  
36  
37  
38  
39  
40  
41  
42  
43  
44  
45  
46  
47  
48  
49  
50  
51  
52  
53  
54  
55  
56  
57  
58  
59  
60

184 *Table 1: Health belief statements grouped by construct with associated Cronbach's Alpha Value*

185

| <b>Health Belief Model Construct (Cronbach's Alpha)</b>                          |                                                                                                                                                                    |
|----------------------------------------------------------------------------------|--------------------------------------------------------------------------------------------------------------------------------------------------------------------|
| <b>1. Susceptibility to seasonal influenza (<math>\alpha = 0.83</math>)</b>      |                                                                                                                                                                    |
|                                                                                  | Now I have had a stem cell transplant I can catch the seasonal flu more easily than other people my age                                                            |
|                                                                                  | Now I have had a stem cell transplant I can catch the seasonal flu more easily than before my transplant                                                           |
| <b>2. Likelihood of catching seasonal influenza (<math>\alpha = 0.91</math>)</b> |                                                                                                                                                                    |
|                                                                                  | My chances of catching seasonal flu next winter will be high if I do not receive the seasonal flu vaccine                                                          |
|                                                                                  | I am more likely than other people my age to catch seasonal flu next winter if I do not receive the seasonal flu vaccine                                           |
|                                                                                  | Now I have had a stem cell transplant it is more likely that I will catch seasonal flu next winter if I do not receive the seasonal flu vaccine                    |
| <b>3. Severity of seasonal influenza infection (<math>\alpha = 0.91</math>)</b>  |                                                                                                                                                                    |
|                                                                                  | If I do not receive the seasonal flu vaccine and caught the seasonal flu next winter this would be a serious illness for me                                        |
|                                                                                  | If I do not receive the seasonal flu vaccine and caught the seasonal flu next winter this would have a negative impact on my recovery from my stem cell transplant |
|                                                                                  | If I do not receive the seasonal flu vaccine and caught the seasonal flu next winter I would become more unwell than other people my age                           |
| <b>4. Barriers to vaccination (<math>\alpha = 0.84</math>)</b>                   |                                                                                                                                                                    |
|                                                                                  | I am worried about side effects of the seasonal flu vaccine                                                                                                        |
|                                                                                  | If I receive the seasonal flu vaccine next winter it may make me feel unwell with the flu or a flu-like illness                                                    |
|                                                                                  | If I receive the seasonal flu vaccine next winter I am more likely to experience side effects than other people my age                                             |
|                                                                                  | If I receive the seasonal flu vaccine next winter it may have a negative impact on my recovery from my stem cell transplant                                        |
|                                                                                  | Now I have had a stem cell transplant the seasonal flu vaccine may not work as well for me as it does for other people my age                                      |
| <b>5. Benefits of vaccination (<math>\alpha = 0.66</math>)</b>                   |                                                                                                                                                                    |
|                                                                                  | If I receive the seasonal flu vaccine next winter it may help to prevent me from catching the seasonal flu                                                         |
|                                                                                  | If I receive the seasonal flu vaccine next winter it may help to prevent me from passing the seasonal flu to other people around me                                |
|                                                                                  | If I receive the seasonal flu vaccine next winter, but still catch the flu, it may help to prevent me from becoming seriously unwell                               |
| <b>6. Cues to vaccination (<math>\alpha = 0.76</math>)</b>                       |                                                                                                                                                                    |

1  
2  
3  
4  
5  
6  
7 If my transplant team advised me to receive the seasonal flu vaccine next winter I would definitely have it

8 If my GP advised me to receive the seasonal flu vaccine next winter I would definitely have it

9 My GP understands my condition enough to know if the seasonal flu vaccine is right for me

10 My transplant team understand my condition enough to know if the seasonal flu vaccine is right for me

---

11 7.Worry ( $\alpha = 0.47$ )

---

12 If I receive the seasonal flu vaccine next winter I will worry less about catching the seasonal flu

13 The thought of catching seasonal flu next winter worries me

---

14 8.Self-efficacy ( $\alpha = 0.29$ )

---

15 I have enough information and am able to decide whether the seasonal flu vaccine is right for me

16 I would find it easy to attend my GP surgery next winter to receive the seasonal flu vaccine

---

17 9.Anticipated regret ( $\alpha = 0.15$ )

---

18 I would regret it if I decided not to receive the seasonal flu vaccine next winter and became unwell with seasonal flu

19 I would regret it if I decided to receive the seasonal flu vaccine next winter and became unwell with side effects

---

1  
2  
3 186 acceptable internal scale reliability [15]. Scale reliability was acceptable for  
4  
5 187 constructs 1-6 (Table 1) and statement scores were summed to give total  
6  
7 188 construct scores for each participant. Scale reliability was unacceptable for  
8  
9 189 constructs 7-9 (Table 1) therefore statements were analysed individually. All  
10  
11 190 construct scores were analysed as continuous scales, with zero representing a  
12  
13 191 neutral response (neither agree nor disagree). Mean agreement scores for low  
14  
15 192 and high intent groups are presented with 95% confidence intervals.  
16  
17  
18  
19

20 194 Participants' mean agreement scores for each mHBM construct were compared  
21  
22 195 between SIIV intention groups using Analysis of Variance (ANOVA).  
23  
24 196 Homogeneity of variances was confirmed with Levene's statistic. HSCT team and  
25  
26 197 GP cue scores *within* low and high intent groups were compared with a paired  
27  
28 198 sample T-Test.  
29  
30

31 199  
32  
33 200 The association between sociodemographic variables, health belief constructs  
34  
35 201 and seasonal influenza vaccination intention was examined with hierarchical  
36  
37 202 binary logistic regression. Variables and constructs that were statistically  
38  
39 203 significant in univariate analysis were included as separate regression blocks.  
40  
41 204 Statistically significant variables that improved the predictive value ( $p < 0.05$  for  
42  
43 205 the regression block) were included in the final model.  
44  
45  
46

47 206  
48  
49 207 The assumption of a linear relationship between each independent variable and  
50  
51 208 log of the outcome variable was tested and confirmed using the Box-Tidwell  
52  
53 209 procedure[16]. Multicollinearity across all constructs was assessed. No variance  
54  
55  
56  
57  
58  
59  
60

1  
2  
3 210 inflation factor was greater than 10, and the mean of values was acceptable at  
4  
5 211 1.92[17].  
6

7 212  
8  
9 213 There were 10 missing data points from 6 participants across the study. These  
10  
11 214 were all responses to mHBM statements from the high intent group. Summed  
12  
13 215 agreement scores were not calculated for that participant for the affected HBM  
14  
15 216 construct only.  
16  
17

18 217

19  
20 218 Results  
21

22 219

23  
24  
25 220 *Patient Characteristics*  
26

27 221

28  
29 222 Characteristics of 93 study participants are given in Table 2. 78.5% were  
30  
31 223 recipients of allogeneic HSCT and the most frequent disease indication was AML  
32  
33 224 (28.0%). The majority (68.6%) were within the first 6 months post HSCT. 40.9%  
34  
35 225 of participants had received the SIIV before HSCT, and 4.3% had received a non-  
36  
37 226 influenza vaccine since HSCT. 52.7% of participants were male, and most  
38  
39 227 (84.9%) were of a white ethnic group.  
40  
41

42 228

43  
44  
45 229 *SIIV vaccination intention for 2016-2017 influenza season*  
46

47 230

48  
49 231 71 (76.3%) participants expressed high SIIV intent, while 22 (23.7%) expressed  
50  
51 232 low SIIV intent.  
52

53 233

54  
55  
56 234  
57  
58  
59  
60

235 Table 2: Characteristics of n=93 study participants. \*Statistically Significant ( $p < 0.05$ )

236

| Characteristic, n=93                   | n(%)      | high SIIV Intent (%) | p     |
|----------------------------------------|-----------|----------------------|-------|
| <b>Gender</b>                          |           |                      |       |
| Male                                   | 49 (52.7) | 81.6                 |       |
| Female                                 | 44 (47.3) | 70.5                 | 0.23  |
| <b>Age group</b>                       |           |                      |       |
| 16-34                                  | 22 (23.7) | 68.2                 |       |
| 35-54                                  | 36 (38.7) | 91.7                 |       |
| 55-64                                  | 20 (21.5) | 75                   |       |
| 65+                                    | 15 (16.1) | 53.5                 | 0.02* |
| <b>HSCT Type</b>                       |           |                      |       |
| Allogeneic                             | 73 (78.5) | 80                   |       |
| Autologous                             | 20 (21.5) | 75.3                 | 0.78  |
| <b>Disease Indication</b>              |           |                      |       |
| Acute lymphoblastic leukaemia (ALL)    | 11 (11.8) | 72.7                 |       |
| Acute myeloid leukaemia (AML)          | 26 (28.0) | 76.9                 |       |
| Aplastic Anaemia (AA)                  | 5 (5.4)   | 60                   |       |
| Chronic myeloid leukaemia (CML)        | 5 (5.4)   | 100                  |       |
| Hodgkin Lymphoma                       | 9 (9.7)   | 88.9                 |       |
| Myelodysplastic syndrome (MDS)         | 5 (5.4)   | 60                   |       |
| Myelofibrosis (MF)                     | 2 (2.2)   | 50                   |       |
| Multiple myeloma (MM)                  | 22 (23.7) | 77.3                 |       |
| Non-Hodgkin Lymphoma (NHL)             | 8 (8.6)   | 75                   | 0.79  |
| <b>months from HSCT</b>                |           |                      |       |
| 0-6                                    | 64 (68.8) | 81.3                 |       |
| >6-12                                  | 20 (21.5) | 70                   |       |
| > 12                                   | 9 (9.7)   | 55.6                 | 0.18  |
| <b>SIIV before HSCT</b>                |           |                      |       |
| Yes                                    | 38 (40.9) | 89.5                 |       |
| No                                     | 55 (59.1) | 67.3                 | 0.01* |
| <b>Any non-SIIV vaccine since HSCT</b> |           |                      |       |
| Yes                                    | 4 (4.3)   | 100                  |       |
| No                                     | 89 (95.7) | 75.3                 | 0.26  |
| <b>Ethnicity</b>                       |           |                      |       |
| White                                  | 79 (84.9) | 77.2                 |       |
| Asian                                  | 8 (8.6)   | 87.5                 |       |
| Black                                  | 3 (3.2)   | 66.7                 |       |
| Mixed                                  | 2 (2.2)   | 50                   |       |
| Other                                  | 1 (1.1)   | 0                    | 0.32  |
| <b>Educational Background</b>          |           |                      |       |
| Higher Education                       | 30 (32.3) | 80                   |       |
| Secondary Education                    | 49 (52.7) | 81.6                 |       |

|                             |           |      |      |
|-----------------------------|-----------|------|------|
| Other                       | 3 (3.2)   | 66.7 |      |
| Prefer not to answer        | 11 (11.8) | 45.5 | 0.07 |
| <b>Living Circumstances</b> |           |      |      |
| Renting                     | 25 (26.9) | 76   |      |
| Home Owner                  | 54 (58.1) | 79.6 |      |
| Other                       | 10 (10.8) | 70   |      |
| Prefer not to answer        | 4 (4.7)   | 50   | 0.56 |
| <b>Relationship Status</b>  |           |      |      |
| Single                      | 23 (24.7) | 78.3 |      |
| Married / Cohabiting        | 56(60.2)  | 80.4 |      |
| Divorced / Separated        | 10 (10.8) | 50   |      |
| Prefer not to answer        | 4 (4.4)   | 75   | 0.22 |

237

238 *Sociodemographic and Transplant Variables*

239

240 There was a statistically significant difference in SIIV intention between age  
 241 groups ( $p=0.02$ ) (Table 2). Rate of high intent was greatest in the 35-54 age  
 242 group at 91.7%, and lowest at 53.3% in the 65+ age group. There was no  
 243 statistically significant difference in gender ( $p=0.23$ ), ethnicity ( $p=0.32$ ),  
 244 educational background ( $p=0.07$ ), living circumstance ( $p=0.56$ ), or relationship  
 245 status ( $p=0.22$ ) between SIIV intention groups.

246

247 There was no difference in type of HSCT ( $p=0.78$ ) or disease indication ( $p=0.79$ )  
 248 between SIIV intention groups. 81.3% of participants answering within the first  
 249 0-6 months post HSCT had high intent, compared with 70% in those answering  
 250 at 6-12 months, and 55.6% among those answering at >12 months from HSCT,  
 251 however this finding was not statistically significant ( $p=0.18$ ). To determine  
 252 whether there was a difference in health beliefs between participants at different  
 253 time points post HSCT, mean agreement scores for all constructs were compared.



1  
2  
3 254 There was no difference in mean agreement scores between participants at 0-6  
4  
5 255 and 6-12 and >12 months post HSCT ( $p>0.05$  in all cases).  
6

7 256

8  
9 257 There was no association between SIIV intention and receipt of any non-  
10  
11 258 influenza vaccine since HSCT ( $p=0.26$ ). However, of those who had received the  
12  
13 259 SIIV prior to HSCT 81.3% had high intent compared with 67.3% of those who  
14  
15 260 had not ( $p=0.01$ )  
16

17  
18 261

19  
20 262 *Health Belief Model Constructs*  
21

22 263

23  
24 264 In univariate analysis, comparing mean construct agreement scores between  
25  
26 265 SIIV intention groups, participants in the high intent group perceived greater  
27  
28 266 susceptibility to influenza (2.09 v 0.05,  $p<0.001$ ), a greater likelihood of  
29  
30 267 contracting influenza (2.58 v -0.45,  $p<0.001$ ) and perceived influenza to be a  
31  
32 268 more severe illness (2.65 v 0.77,  $p=0.002$ ) (Table 3). They also perceived greater  
33  
34 269 potential benefit from vaccination (2.56 v -0.05,  $p<0.001$ ), and fewer barriers to  
35  
36 270 vaccination (-1.55 v 1.27,  $p=0.001$ ). Although the two groups expressed similar  
37  
38 271 levels of worry about catching influenza (0.14 v 0.81,  $p=0.34$ ), participants in the  
39  
40 272 high intent group felt they would worry less about catching influenza if  
41  
42 273 vaccinated compared with the low intent group (0.80 v -0.23,  $p<0.001$ ). They  
43  
44 274 also expressed greater concern about anticipated regret if they caught influenza  
45  
46 275 having not been vaccinated (1.35 v 0.27,  $p<0.001$ ). Level of anticipated regret of  
47  
48 276 experiencing side effects if vaccinated was similarly low across the two groups (-  
49  
50 277 0.09 v 0.13,  $p=0.40$ ). Participants in the high intent group felt more strongly that  
51  
52 278 they had enough information to make decisions about vaccination (0.81 v 0.14,  
53  
54  
55  
56  
57  
58  
59  
60

279 p=0.007) and that it would be easy to attend their general practice surgery for  
 280 vaccination (1.10 v 0.32, p<0.001).

281

282 *Table 3: Mean agreement score values for health belief constructs for low and high*

283 *SIIV intent groups. <sup>a</sup>n=68, <sup>b</sup>n=69, <sup>c</sup>n=70*

| Health Belief Model Construct                       | Low SIIV Intent<br>(n=22) | High SIIV intent<br>(n=71)          | p      |
|-----------------------------------------------------|---------------------------|-------------------------------------|--------|
| 1. Susceptibility to seasonal influenza             | 0.05 (-0.70 to 0.70)      | 2.09 (1.75 to 4.39)                 | <0.001 |
| 2. Likelihood of catching seasonal influenza        | -0.45 (-1.39 to 0.40)     | 2.58 (2.00 to 3.18) <sup>b</sup>    | <0.001 |
| 3. Severity of Seasonal influenza infection         | 0.77 (-0.17 to 1.72)      | 2.65 (2.09 to 3.23) <sup>b</sup>    | 0.002  |
| 4. Barriers to vaccination                          | 1.27 (0.11 to 2.44)       | -1.55 (-2.34 to -0.80) <sup>a</sup> | 0.001  |
| 5. Benefits of vaccination                          | -0.05 (0.00 to 1.78)      | 2.56 (2.13 to 3.00)                 | <0.001 |
| 6. Cues to Vaccination                              |                           |                                     |        |
| HSCT team understands my condition                  | 1.14 (0.55 to 1.32)       | 1.63 (1.52 to 1.75)                 | <0.001 |
| GP understands my condition                         | -0.32 (0.83 to 0.13)      | 0.59 (0.55 to 0.83) <sup>c</sup>    | <0.001 |
| 7. Worry                                            |                           |                                     |        |
| About catching influenza                            | 0.14 (-0.43 to 0.71)      | 0.39 (0.17 to -0.63)                | 0.34   |
| Less about catching influenza if vaccinated         | -0.23 (0.60 to 0.07)      | 0.80 (0.61 to 1.00)                 | <0.001 |
| 8. Self-efficacy                                    |                           |                                     |        |
| Have enough information to decide about vaccination | 0.14 (-0.32 to 0.58)      | 0.81 (0.61 to 1.00)                 | 0.007  |
| Would find it easy to attend GP for vaccination     | 0.32 (-0.12 to 1.72)      | 1.10 (1.89 to 2.00)                 | <0.001 |
| 9. Anticipated regret                               |                           |                                     |        |
| of catching flu if not vaccinated                   | 0.27 (-0.21 to 0.74)      | 1.35 (1.18-1.52)                    | <0.001 |
| of side effects if vaccinated                       | -0.09 (-0.15 to 0.37)     | 0.13 (-0.12 to 0.39)                | 0.4    |

284

285

286

1  
2  
3 287 A multivariate regression model (Table 4) was statistically significant when  
4  
5 288 compared with a constant only model ( $p < 0.001$ ) indicating that this set of  
6  
7 289 variables and constructs distinguishes reliably between HSCT recipients who  
8  
9 290 express low and high SIIV intent. There was a moderately strong relationship  
10  
11 291 with 74.7% (Nagelkerke  $R^2$ ) of variation in vaccination intention explained by  
12  
13 292 the overall model. GP ( $p = 0.24$ ) and HSCT Team (0.18) cues to vaccination, self-  
14  
15 293 efficacy ( $p = 0.37$ ) and anticipated regret ( $p = 0.78$ ) constructs did not significantly  
16  
17 294 improve predictive value and so were not included in the final model. Age and  
18  
19 295 pre-HSCT SIIV vaccination receipt remained independent predictors of SIIV  
20  
21 296 intention, with those aged  $> 65$  (OR 0.02, 95%CI 0.01-0.57,  $p = 0.02$ ) and those  
22  
23 297 who had not received SIIV before HSCT (OR 0.4, 95%CI 0.02-0.56,  $p = 0.02$ ) more  
24  
25 298 likely to be in the low intent group. A greater perceived benefit of vaccination  
26  
27 299 was the strongest predictor of being in the high intent group (OR 2.96, 95%CI  
28  
29 300 1.29-6.81,  $p = 0.01$ ). Although the constructs susceptibility to influenza,  
30  
31 301 likelihood of contracting influenza, severity of influenza infection, barriers to  
32  
33 302 vaccination and worry about catching influenza improved the predictive value of  
34  
35 303 the overall multivariate model, they did not independently predict vaccination  
36  
37 304 intention.

305

306

307

308

309

310

311

312 *Table 4 Multivariate logistic regression model predicting odds of high SIIV intent.*

313 *Overall model was statistically significant compared with a constant only model*

314 *( $p < 0.001$ ). \*Statistically significant independent predictor ( $p < 0.05$ )*

315

| Variable                                                   | Odds Ratio of high SIIV Intent (95% CI) | P     |
|------------------------------------------------------------|-----------------------------------------|-------|
| Age >65                                                    | 0.02 (0.01-0.57)                        | 0.02* |
| No SIIV before HSCT                                        | 0.04 (0.02-0.56)                        | 0.02* |
| Benefits of vaccination                                    | 2.96 (1.29-6.81)                        | 0.01* |
| Susceptibility to seasonal Influenza                       | 0.96 (0.33-2.78)                        | 0.64  |
| Likelihood of catching seasonal influenza                  | 1.68 (0.86-3.26)                        | 0.13  |
| Severity of seasonal influenza infection                   | 0.69 (0.39-1.21)                        | 0.20  |
| Barriers to vaccination                                    | 0.69 (0.57-0.99)                        | 0.05  |
| Worry less about catching seasonal influenza if vaccinated | 4.99 (1.01-24.77)                       | 0.05  |

316

317

318 *Cues to Vaccination and Preferred Vaccination Location*

319

320 Considering their HSCT team and GPs, both high (1.63 v 0.59,  $p < 0.001$ ) and low  
 321 intent groups (1.14 v -0.32,  $p < 0.001$ ) agreed more strongly with statements that  
 322 their HSCT team understands their condition enough to know if the influenza  
 323 vaccine is right for them. Patients were also asked how much they agreed with  
 324 the statement that they would definitely have the vaccine if their GP or HSCT  
 325 team recommended it. Agreement scores were dichotomized to low agreement  
 326 ( $\leq$  neutral value) and high agreement ( $>$  neutral value). Of those 22 patients with  
 327 low intent, 90% agreed that they would receive the vaccine if their HSCT Team

1  
2  
3 328 recommended it, and only 22.7% if their GP recommended it, compared with  
4  
5 329 98.6% and 90.0% respectively in the high intent group.  
6  
7 330  
8  
9 331 Participant responses to the statement *I would prefer to have the seasonal*  
10  
11 332 *influenza vaccine next winter at my transplant centre instead of my GP surgery*  
12  
13 333 were categorized into prefers HSCT centre, prefers GP surgery or no preference.  
14  
15 334 Of the low intent group, over half (54.5%) favoured vaccination at their HSCT  
16  
17 335 centre, with only a minority (4.5%) favouring vaccination at their GP surgery. Of  
18  
19 336 those with high intent 43.7% favoured vaccination at their HSCT programme,  
20  
21 337 compared with 29.6% at their GP surgery although these findings did not reach  
22  
23 338 statistical significance (p=0.05).  
24  
25  
26

27 339

28  
29 340 Discussion  
30

31 341

32  
33 342 To our knowledge, this is the first study to explore sociodemographic factors and  
34  
35 343 psychological determinants of SIIV intention amongst HSCT recipients. Patients  
36  
37 344 from 3 geographically dispersed study sites completed anonymous  
38  
39 345 questionnaires. We identified low SIIV intent in approximately a quarter of  
40  
41 346 participants. Participants' SIIV uptake during the 2016-2017 UK influenza  
42  
43 347 season was not evaluated, and uptake may not be equivalent to intent rates  
44  
45 348 reported here.  
46  
47  
48

49 349

50  
51 350 Constructs of a mHBM were significant determinants of SIIV intention.52  
53 351 Strategies tailored to a population and their specific concerns are the most54  
55 352 effective at improving knowledge and changing attitudes towards vaccination,  
56  
57  
58  
59  
60

1  
2  
3 353 and increasing vaccine uptake[18]. Based on our findings, the mHBM may  
4  
5 354 provide a useful framework for structuring strategies to address low SIIV intent  
6  
7 355 in the HSCT population. Exploring HSCT recipients increased risk of influenza,  
8  
9 356 both in terms of susceptibility and severity, discussing the potential benefits of  
10  
11 357 vaccination, and exploring concerns around side effects may help to promote  
12  
13 358 vaccine intent and uptake.  
14  
15

16 359  
17  
18 360 A strong association between past vaccination behaviours and future vaccination  
19  
20 361 intent has been reported[19]. Previous influenza vaccination has been  
21  
22 362 associated with high intent or uptake in all at risk groups [20,21] and cancer  
23  
24 363 patients[22] and our findings accord with this. It may therefore be helpful to  
25  
26 364 explore recipients pre-HSCT SIIV behaviour and discussion rationale for refusal  
27  
28 365 where appropriate.  
29  
30

31 366  
32  
33 367 It was reassuring to find that none of gender, ethnicity, educational background,  
34  
35 368 living circumstances or relationship status were associated with vaccine  
36  
37 369 hesitancy in this study. However, vaccination intention did vary with age. High  
38  
39 370 intent was greatest at 91.7% in the 35-53 age bracket, but of concern, fell in  
40  
41 371 those over 65 to 53.5%, which is below the 2015-2016 uptake rate of 71% in the  
42  
43 372 equivalent UK general population age-group[23]. Older age has been reported as  
44  
45 373 a barrier to vaccination in a cohort of oncology patients, including some with  
46  
47 374 haematological malignancy [22]. However, a French study of patients with  
48  
49 375 secondary immunodeficiency, including haematological disorders, reported  
50  
51 376 higher vaccination rates in those aged over 65 compared with younger  
52  
53 377 patients[24]. In a UK study, older age was found to be a predictor of uptake of the  
54  
55  
56  
57  
58  
59  
60

1  
2  
3 378 2009 pandemic influenza A vaccine amongst high-risk adults[25]. A meta-  
4  
5 379 analysis of international studies found inconsistent association between age and  
6  
7 380 vaccination intent and uptake in the general public, older patients, and those  
8  
9 381 with chronic disease [19]. It is not apparent from these studies why age impacts  
10  
11 382 on intent, and there are likely to be a range of social, psychological, financial and  
12  
13 383 healthcare access issues specific to each study population. Our findings highlight  
14  
15 384 a specific age group in whom intent is low and may benefit from targeted  
16  
17 385 intervention. Further evaluation of this finding and exploration of underlying  
18  
19 386 determinants is warranted.  
20  
21  
22  
23  
24

25 388 High SIIV intent was greatest in those recipients within the first 0-6 months'  
26  
27 389 post-HSCT (81.3%) and lowest at more than 12 months (55.6%) although this  
28  
29 390 finding was not statistically significant. Longer time from HSCT may be  
30  
31 391 associated with a change in perceived risk of infection, or concern about vaccine  
32  
33 392 side effects or efficacy; however, we did not detect any statistically significant  
34  
35 393 difference in health beliefs at 0-6, 6-12 and > 12 months from HSCT. This finding  
36  
37 394 suggests there is a need for reinforcement of SIIV intent from healthcare  
38  
39 395 professionals throughout and beyond the first-year post HSCT.  
40  
41  
42  
43

44  
45 397 In both vaccine intention groups, patients expressed greater confidence in their  
46  
47 398 HSCT team than their GP, with respect to understanding of whether the influenza  
48  
49 399 vaccine is right for them. Fewer patients felt that a recommendation from their  
50  
51 400 GP would prompt them to receive the SIIV compared with if their HSCT Team  
52  
53 401 made the recommendation. This was most marked in the low intent group.  
54  
55 402 These findings suggest that cues from the HSCT team are important in promoting  
56  
57  
58  
59  
60

1  
2  
3 403 vaccination amongst HSCT recipients, and particularly for those with low intent.  
4  
5 404 Cues from healthcare providers are considered a key factor in promoting  
6  
7 405 vaccination[19] and a study of Israeli cancer patients identified recommendation  
8  
9 406 from an oncologist as a significant predictor of vaccine uptake [22]. Our findings  
10  
11 407 accord with this, and suggest that HSCT recipients value the advice of their  
12  
13 408 specialist team. This highlights the importance of HSCT specialists engaging in  
14  
15 409 discussion with patients about influenza vaccination. Preference for vaccination  
16  
17 410 at HSCT centres rather than GP surgeries was similar at 43.7% and 54.5% in low  
18  
19 411 and high intent groups respectively. In the high intent group, more patients  
20  
21 412 expressed a preference for vaccination at their GP surgery than in the low intent  
22  
23 413 group. For approximately 50% of those HSCT recipients with both low and high  
24  
25 414 intent, access to an SIIV service at HSCT centres may facilitate vaccination uptake  
26  
27  
28  
29 415  
30  
31 416 None of the transplant variables assessed were associated with SIIV intention.  
32  
33 417 Current influenza vaccination guidelines are standardized for all HSCT recipients  
34  
35 418 as evidence is insufficient to recommend modification according to donor type,  
36  
37 419 stem cell source or conditioning[4,5]. Influenza infections are reported to occur  
38  
39 420 with higher frequency in allogeneic compared with autologous HSCT recipients  
40  
41 421 [26,27] and may have a higher associated morbidity and mortality[28] although  
42  
43 422 this latter finding has not been consistently reported[1]. There was no  
44  
45 423 difference in vaccination intention between autologous and allogeneic HSCT  
46  
47 424 recipients. This suggests the unique aspects of allogeneic HSCT, principally GvHD  
48  
49 425 and the need for immunosuppressive therapy, do not contribute to increased  
50  
51 426 influenza vaccination intention in this group compared with autoHSCT recipients.  
52  
53  
54  
55 427  
56  
57  
58  
59  
60



1  
2  
3 428 Conclusion  
4

5 429  
6

7 430 Our data indicates that the constructs of a mHBM are important determinants of  
8  
9 431 SIIV intention in the HSCT recipient population. These constructs may be used to  
10  
11 432 structure interventions addressing low SIIV intent, and prospective studies are  
12  
13 433 warranted. Those aged over 65, and those who had not received the SIIV prior to  
14  
15 434 HSCT were particularly likely to have low intent and may be target groups. HSCT  
16  
17 435 recipients strongly value the expertise and recommendation of their transplant  
18  
19 436 team, and we would encourage practitioners to discuss SIIV intention with  
20  
21 437 patients as a routine and important aspect of post-transplant care. Local  
22  
23 438 provision of vaccination services at HSCT centres may serve as an additional  
24  
25 439 promoter for a proportion of patients.  
26  
27  
28

29 440  
30

31 441 Authorship Statement  
32

33 442  
34

35  
36 443 Paul D E Miller, Alice S Forster, Thushan I de Silva, Karl Peggs, Alejandro  
37  
38 444 Madrigal and John A Snowden made substantial contributions to the conception  
39  
40 445 and design of the work, and to analysis and interpretation of data.  
41  
42

43 446  
44

45 447 Hayley Leonard, Chloe Anthias, Michaela Mayhew, Matthias Klammer, Susan  
46  
47 448 Paskar and Erin Hurst made substantial contributions to the acquisition of data.  
48

49 449  
50

51 450 All named authors contributed to the drafting and revising for important  
52  
53 451 intellectual content and gave final of the manuscript. All authors agree to be  
54  
55 452 accountable for all aspects of the work in ensuring that questions related to the  
56  
57  
58  
59  
60

1  
2  
3 453 accuracy or integrity of any part of the work are appropriately investigated and  
4  
5 454 resolved.

6  
7 455

8  
9 456 Data sharing statement

10  
11 457

12  
13 458 The study dataset will be made available via Dryad repository and DOI provided

14  
15 459 following editorial review

16  
17 460

18  
19 461 References

20  
21 462

22  
23 463 1 Nichols WG, Guthrie K a, Corey L, *et al.* Influenza infections after

24  
25 464 hematopoietic stem cell transplantation: risk factors, mortality, and the

26  
27 465 effect of antiviral therapy. *Clin Infect Dis* 2004;**39**:1300–6.

28  
29 466 doi:10.1086/425004

30  
31 467 2 Whimbey E, Elting LS, Couch RB, *et al.* Influenza A virus infections among

32  
33 468 hospitalized adult bone marrow transplant recipients. *Bone Marrow*

34  
35 469 *Transplant* 1994;**13**:437–40.

36  
37 470 3 Shah DP, Ghantaji SS, Mulanovich VE, *et al.* Management of respiratory

38  
39 471 viral infections in hematopoietic cell transplant recipients. 2012;**2**:203–18.

40  
41 472 4 Rubin LG, Levin MJ, Ljungman P, *et al.* 2013 IDSA clinical practice guideline

42  
43 473 for vaccination of the immunocompromised host. *Clin Infect Dis*

44  
45 474 2014;**58**:1–57. doi:10.1093/cid/cit684

46  
47 475 5 Tomblyn M, Chiller T, Einsele H, *et al.* Guidelines for preventing infectious

48  
49 476 complications among hematopoietic cell transplantation recipients: a

50  
51 477 global perspective. Preface. *Bone Marrow Transplant* 2009;**15**:1143–238.

- 1  
2  
3 478 doi:10.1038/bmt.2009.254  
4  
5 479 6 Snowden JA, Greenfield DM, Bird JM, *et al.* Guidelines for screening and  
6  
7 480 management of late and long-term consequences of myeloma and its  
8  
9 481 treatment. *Br J Haematol* 2017;**176**:888–907. doi:10.1111/bjh.14514  
10  
11 482 7 Miller PDE, de Silva TI, Skinner R, *et al.* Routine Vaccination Programme  
12  
13 483 (RVP) Practice after Adult and Paediatric Allogeneic Haematopoietic Stem  
14  
15 484 Cell Transplant (HSCT): A British Society of Blood and Marrow  
16  
17 485 Transplantation (BSBMT) Survey of UK NHS-Based Programmes. *Bone*  
18  
19 486 *Marrow Transplant* 2016;**51**:S400.  
20  
21  
22 487 8 Leonard H, Anthias C. Improving the re-vaccination programme for  
23  
24 488 patients post allograft. *Bone Marrow Transplant* 2015;**50**:216–7.  
25  
26 489 doi:10.1038/sj.bmt.1703986  
27  
28  
29 490 9 Meiring J, de Silva TI, Snowden JA. A study of adherence to a vaccination  
30  
31 491 schedule following adult allogeneic haematopoietic stem cell transplants  
32  
33 492 in UK transplant centre. *Bone Marrow Transplant* 2015;**50**:s203–4.  
34  
35  
36 493 10 Ariza-Heredia EJ, Gulbis AM, Stolar KR, *et al.* Vaccination guidelines after  
37  
38 494 hematopoietic stem cell transplantation: practitioners' knowledge,  
39  
40 495 attitudes, and gap between guidelines and clinical practice. *Transpl Infect*  
41  
42 496 *Dis* 2014;**16**:878–86. doi:10.1111/tid.12312  
43  
44  
45 497 11 Rosenstock IM. Why People Use Health Services. *Milbank Q* 1966;**44**:1107–  
46  
47 498 8.  
48  
49 499 12 Brewer NT, Chapman GB, Gibbons FX, *et al.* Meta-analysis of the  
50  
51 500 relationship between risk perception and health behavior: the example of  
52  
53 501 vaccination. *Health Psychol* 2007;**26**:136–45. doi:10.1037/0278-  
54  
55 502 6133.26.2.136  
56  
57  
58  
59  
60

- 1  
2  
3 503 13 Chapman GB, Coups EJ. Emotions and preventive health behavior: worry,  
4  
5 504 regret, and influenza vaccination. *Health Psychol* 2006;**25**:82–90.  
6  
7 505 doi:10.1037/0278-6133.25.1.82  
8  
9 506 14 Abraham C, Sheeran P. Acting on intentions: The role of anticipated regret.  
10  
11 507 *Br J Soc Psychol* 2003;**42**:495–511.  
12  
13 508 15 Panayides P. Coefficient Alpha: Interpret With Caution. *Eur J Psychol*  
14  
15 509 2013;**9**:687–96. doi:10.5964/ejop.v9i4.653  
16  
17 510 16 Box GEP, Tidwell PW. Transformation of the Independent Variables.  
18  
19 511 *Technometrics* 1962;**4**:531–50.  
20  
21 512 17 Field A. *Discovering Statistics Using IBM SPSS Statistics*. Fourth. Sage 2014.  
22  
23 513 18 Jarrett C, Wilson R, O’Leary M, *et al*. Strategies for addressing vaccine  
24  
25 514 hesitancy - A systematic review. *Vaccine* 2015;**33**:4180–90.  
26  
27 515 doi:10.1016/j.vaccine.2015.04.040  
28  
29 516 19 Schmid P, Rauber D, Betsch C, *et al*. *Barriers of Influenza Vaccination*  
30  
31 517 *Intention and Behavior - A Systematic Review of Influenza Vaccine Hesitancy,*  
32  
33 518 *2005 - 2016*. 2017. doi:10.1371/journal.pone.0170550  
34  
35 519 20 Nagata JM, Hernández-Ramos I, Kurup a S, *et al*. Social determinants of  
36  
37 520 health and seasonal influenza vaccination in adults  $\geq 65$  years: A  
38  
39 521 systematic review of qualitative and quantitative data. *BMC Public Health*  
40  
41 522 2013;**13**.  
42  
43 523 21 Yeung MPS, Lam FLY, Coker R. Factors associated with the uptake of  
44  
45 524 seasonal influenza vaccination in adults: a systematic review. *J Public*  
46  
47 525 *Health (Bangkok)* 2016;;fdv194. doi:10.1093/pubmed/fdv194  
48  
49 526 22 Vinograd I, Baslo R, Farbman L, *et al*. Factors associated with influenza  
50  
51 527 vaccination among adult cancer patients : a case – control study. *Clin*  
52  
53  
54  
55  
56  
57  
58  
59  
60

- 1  
2  
3 528 *Microbiol Infect* 2014;**20**:899–905. doi:10.1111/1469-0691.12625  
4  
5 529 23 NHS England. The National Flu Immunisation Programme 2016/2017.  
6  
7 530 2016.https://www.gov.uk/government/uploads/system/uploads/attach  
8  
9 531 ment\_data/file/529954/Annual\_flu\_letter\_2016\_2017.pdf (accessed 22  
10  
11 532 Feb 2017).  
12  
13 533 24 Loubet P, Kernéis S, Groh M, *et al*. Attitude, knowledge and factors  
14  
15 534 associated with influenza and pneumococcal vaccine uptake in a large  
16  
17 535 cohort of patients with secondary immune deficiency. *Vaccine*  
18  
19 536 2015;**33**:3703–8. doi:10.1016/j.vaccine.2015.06.012  
20  
21 537 25 Myers LB, Goodwin R. Using a theoretical framework to determine adults’  
22  
23 538 intention to vaccinate against pandemic swine flu in priority groups in the  
24  
25 539 UK. *Public Health* 2012;**126**:S53–6. doi:10.1016/j.puhe.2012.05.024  
26  
27 540 26 Hassan I a, Chopra R, Swindell R, *et al*. Respiratory viral infections after  
28  
29 541 bone marrow/peripheral stem-cell transplantation: the Christie hospital  
30  
31 542 experience. *Bone Marrow Transplant* 2003;**32**:73–7.  
32  
33 543 doi:10.1038/sj.bmt.1704048  
34  
35 544 27 Ljungman P, Ward KN, Crooks BN a, *et al*. Respiratory virus infections after  
36  
37 545 stem cell transplantation : a prospective study from the Infectious  
38  
39 546 Diseases Working Party of the European Group for Blood and Marrow  
40  
41 547 Transplantation Summary : *Bone Marrow Transplant* 2001;**47**:479–84.  
42  
43 548 28 Martino R, Porrás RP, Rabella N, *et al*. Prospective Study of the Incidence,  
44  
45 549 Clinical Features, and Outcome of Symptomatic Upper and Lower  
46  
47 550 Respiratory Tract Infections by Respiratory Viruses in Adult Recipients of  
48  
49 551 Hematopoietic Stem Cell Transplants for Hematologic Malignancies. *Biol*  
50  
51 552 *Blood Marrow Transpl* 2015AD;**11**:781–96.  
52  
53  
54  
55  
56  
57  
58  
59  
60

1  
2  
3 553 doi:10.1016/j.bbmt.2005.07.007.Prospective  
4

5 554  
6  
7  
8  
9  
10  
11  
12  
13  
14  
15  
16  
17  
18  
19  
20  
21  
22  
23  
24  
25  
26  
27  
28  
29  
30  
31  
32  
33  
34  
35  
36  
37  
38  
39  
40  
41  
42  
43  
44  
45  
46  
47  
48  
49  
50  
51  
52  
53  
54  
55  
56  
57  
58  
59  
60

For peer review only

# BMJ Open

## Sociodemographic and psychological determinants of influenza vaccine intention amongst recipients of autologous and allogeneic haematopoietic stem cell transplant: a cross-sectional survey of UK transplant recipients using a modified health belief model.

|                                 |                                                                                                                                                                                                                                                                                                                                                                                                                                                                                                                                                                                                                                                                                                                                                                                                                                                                                                                                                                                                                                                                                                  |
|---------------------------------|--------------------------------------------------------------------------------------------------------------------------------------------------------------------------------------------------------------------------------------------------------------------------------------------------------------------------------------------------------------------------------------------------------------------------------------------------------------------------------------------------------------------------------------------------------------------------------------------------------------------------------------------------------------------------------------------------------------------------------------------------------------------------------------------------------------------------------------------------------------------------------------------------------------------------------------------------------------------------------------------------------------------------------------------------------------------------------------------------|
| Journal:                        | <i>BMJ Open</i>                                                                                                                                                                                                                                                                                                                                                                                                                                                                                                                                                                                                                                                                                                                                                                                                                                                                                                                                                                                                                                                                                  |
| Manuscript ID                   | bmjopen-2017-021222.R1                                                                                                                                                                                                                                                                                                                                                                                                                                                                                                                                                                                                                                                                                                                                                                                                                                                                                                                                                                                                                                                                           |
| Article Type:                   | Research                                                                                                                                                                                                                                                                                                                                                                                                                                                                                                                                                                                                                                                                                                                                                                                                                                                                                                                                                                                                                                                                                         |
| Date Submitted by the Author:   | 12-Mar-2018                                                                                                                                                                                                                                                                                                                                                                                                                                                                                                                                                                                                                                                                                                                                                                                                                                                                                                                                                                                                                                                                                      |
| Complete List of Authors:       | Miller, Paul; Anthony Nolan Trust, Anthony Nolan Research Institute<br>Forster, Alice; UCL, Research Department of Behavioural Science and Health<br>de Silva, Thushan; Sheffield Teaching Hospitals NHS Foundation Trust, Department of Infection and Tropical Medicine<br>Leonard, Hayley; Anthony Nolan Trust, Anthony Nolan Research Institute<br>Anthias, Chloe; Anthony Nolan Trust, Anthony Nolan Research Institute;<br>Royal Marsden Hospital Sutton, Department of Haemato-Oncology<br>Mayhew, Michaela; St George's NHS Foundation Trust, Department of Haematology<br>Klammer, Matthias; St George's NHS Foundation Trust, Department of Haematology<br>Paskar, Susan; Freeman Hospital, Northern Centre for Cancer Care<br>Hurst, Erin; Freeman Hospital, Northern Centre for Cancer Care<br>Peggs, Karl; University College London Hospitals NHS Foundation Trust, Department of Clinical Haematology<br>Madrigal, Alejandro; Anthony Nolan Trust, Anthony Nolan Research Institute<br>Snowden, John; Sheffield Teaching Hospitals NHS Foundation Trust, Department of Haematology |
| <b>Primary Subject Heading</b>: | Haematology (incl blood transfusion)                                                                                                                                                                                                                                                                                                                                                                                                                                                                                                                                                                                                                                                                                                                                                                                                                                                                                                                                                                                                                                                             |
| Secondary Subject Heading:      | Public health                                                                                                                                                                                                                                                                                                                                                                                                                                                                                                                                                                                                                                                                                                                                                                                                                                                                                                                                                                                                                                                                                    |
| Keywords:                       | Influenza, Inactivated influenza vaccine, Bone marrow transplantation < HAEMATOLOGY, Adult oncology < ONCOLOGY, PUBLIC HEALTH, Respiratory infections < THORACIC MEDICINE                                                                                                                                                                                                                                                                                                                                                                                                                                                                                                                                                                                                                                                                                                                                                                                                                                                                                                                        |
|                                 |                                                                                                                                                                                                                                                                                                                                                                                                                                                                                                                                                                                                                                                                                                                                                                                                                                                                                                                                                                                                                                                                                                  |

SCHOLARONE™  
Manuscripts

1 Sociodemographic and psychological determinants of influenza vaccine intention  
2 amongst recipients of autologous and allogeneic haematopoietic stem cell  
3 transplant: a cross-sectional survey of UK transplant recipients using a modified  
4 health belief model.

5  
6 Paul D E Miller MRCP<sup>1\*</sup> pauldemiller@doctors.org.uk, Alice S Forster PhD<sup>2</sup>,  
7 Thushan I de Silva PhD<sup>3</sup>, Hayley Leonard BSc<sup>1</sup>, Chloe Anthias MD<sup>1,4</sup>, Michaela  
8 Mayhew MSc<sup>5</sup>, Matthias Klammer MD<sup>5</sup>, Susan Paskar BSc<sup>6</sup>, Erin Hurst FRCPath<sup>6</sup>,  
9 Karl Peggs PhD<sup>7</sup>, Alejandro Madrigal PhD<sup>1</sup>, John A Snowden MD<sup>8</sup>

10  
11 <sup>1</sup>Anthony Nolan Research Institute, Royal Free Hospital, Pond Street, London,  
12 NW3 2QU, United Kingdom, pauldemiller@doctors.org.uk, t 020 7284 8278

13 <sup>2</sup> Research Department of Behavioural Science and Health, University College  
14 London, London, United Kingdom

15 <sup>3</sup>Department of Infection and Tropical Medicine, Sheffield Teaching Hospitals  
16 NHS Foundation Trust, Sheffield, United Kingdom

17 <sup>4</sup>Department of Haemato-Oncology, Royal Marsden NHS Foundation Trust,  
18 London, United Kingdom

19 <sup>5</sup>Department of Haematology, St George's NHS Foundation Trust, London, United  
20 Kingdom

21 <sup>6</sup> Northern Centre for Cancer Care, Freeman Hospital, Newcastle upon Tyne,  
22 United Kingdom

23 <sup>7</sup>Department of Clinical Haematology, University College London Hospitals NHS  
24 Foundation Trust, London, United Kingdom



1  
2  
3 25 <sup>8</sup>Department of Clinical Haematology, Sheffield Teaching Hospitals NHS  
4 Foundation Trust, Sheffield

5  
6  
7 27

8  
9 28 \*Corresponding Author

10  
11 29

12  
13  
14 30 This work was supported by the Anthony Nolan Research Institute (No grant  
15 number).

16  
17  
18 32 Alice Forster is funded by Cancer Research UKC49896/A17429

19  
20 33

21  
22 34 The authors have no competing interests to declare

23  
24 35

25  
26 36 Abstract

27  
28 37

29  
30  
31 38 Objectives: Studies exploring vaccination rates amongst haematopoietic stem  
32 cell transplant (HSCT) recipients have focused on physician factors that limit  
33 uptake. Understanding the patient factors that determine vaccination intention  
34 is crucial to delivering a successful vaccination programme. Using a modified  
35 Health Belief Model (mHBM), we conducted a cross-sectional survey with the  
36 objective of exploring the sociodemographic and psychological factors that  
37 determined autologous and allogeneic HSCT recipients' intention to receive the  
38 seasonal inactivated influenza vaccine (SIIV) during the 2015-2016 influenza  
39 season.

40  
41 47

42  
43  
44 48 Setting: The setting of our study was three tertiary-level, UK NHS autologous and  
45 allogeneic HSCT centres.

1  
2  
3 50  
4

5 51 Participants: Eligible patients were aged 16 years or over and recipients of  
6  
7 52 autologous or allogeneic HSCT for any disease indication, with no absolute  
8  
9 53 contraindication to receiving the SIIV during the next influenza season, and  
10  
11 54 having not received the SIIV since transplant. 93 participants from 3 UK NHS  
12  
13 55 HSCT centres completed an anonymous study-specific questionnaire. 78.5%  
14  
15 56 were recipients of allogeneic and 21.5% autologous HSCT.  
16  
17

18 57  
19

20 58 Results: 23.7% of participants expressed low intent to receive the SIIV. patients  
21  
22 59 aged over 65 (OR 0.02, 95% CI 0.01-0.57, p=0.02) and those who had not  
23  
24 60 received the SIIV prior to HSCT (OR 0.04, 0.02-0.56, p=0.02) were more likely to  
25  
26 61 have low intent. A multivariate logistic regression model incorporating  
27  
28 62 constructs of the mHBM was statistically significant (p<0.001) and explained  
29  
30 63 74.7% of variation in SIIV intention. More patients felt that a recommendation  
31  
32 64 from their HSCT team than their General Practitioner would prompt them to  
33  
34 65 receive the SIIV, and this was most pronounced in those who had low intent.  
35  
36 66

37  
38 66  
39

40 67 Conclusions: The mHBM may provide a useful structure for addressing low  
41  
42 68 vaccine intent amongst HSCT recipients and further interventional studies are  
43  
44 69 warranted. We would encourage HSCT and General practitioners to discuss SIIV  
45  
46 70 intention as a routine part of care.  
47  
48

49 71  
50

51 72 HRA REC reference 16/WM/0144  
52  
53 73

54  
55 74 Strengths of Study  
56  
57  
58  
59  
60

1  
2  
3 75

4  
5 76 -To our knowledge this is the first study to explore determinants of influenza  
6  
7 77 vaccine uptake in a population of haematopoietic stem cell transplant recipients  
8  
9 78 -Participants from 3 geographically dispersed study sites completed anonymous  
10  
11 79 questionnaires  
12  
13  
14 80 - The questionnaire was based on the established theoretical framework of the  
15  
16 81 Health Belief Model, and questions were specific with regard to vaccine and  
17  
18 82 2015-2016 season.  
19

20  
21 83

22  
23 84 Limitations

24  
25 85 -The study explored intention to receive the inactivated influenza vaccine during  
26  
27 86 the 2015-2016 influenza season. Uptake was not assessed and may differ from  
28  
29 87 intention rates.  
30

31  
32 88

33  
34 89 -The number of enrolled participants expressing low vaccination intent was  
35  
36 90 small at 22 (23.7%) and this may bias our data.  
37

38  
39 91

40  
41 92 Introduction

42  
43 93

44  
45 94 Innate and adaptive immune responses are impaired for months to years  
46  
47 95 following autologous and allogeneic haematopoietic stem cell transplant (HSCT).  
48  
49 96 HSCT recipients are at high risk of morbidity and mortality from influenza  
50  
51 97 viruses[1-3] and guidelines recommend that the seasonal inactivated influenza  
52  
53 98 vaccine (SIIV) is administered annually starting 4 to 6 months post HSCT [4-6].  
54  
55 99 While the SIIV is recommended by 96% of UK NHS allogeneic HSCT  
56  
57  
58  
59  
60

1  
2  
3 100 programmes[7], uptake rates of only 60-70% in the first 2 years post HSCT have  
4  
5 101 been reported amongst UK HSCT recipients[8,9]. The majority of UK allogeneic  
6  
7 102 HSCT recipients are referred to their General Practitioner (GP) with only 8% of  
8  
9 103 UK adult allogeneic HSCT programmes offering vaccination services. SIV  
10  
11 104 efficacy of 65.4-80% has been reported in HSCT recipients, although in small  
12  
13 105 cohorts [10,11] In both the UK and USA, physicians' familiarity with current  
14  
15 106 guidelines, and perception of graft-versus-host disease (GvHD) as a  
16  
17 107 contraindication to vaccination have been identified as factors limiting vaccine  
18  
19 108 uptake rates[8,9,12]. No studies to-date have explored the patient factors that  
20  
21 109 influence SIV hesitancy or intention in an HSCT recipient population.  
22  
23  
24  
25 110  
26  
27 111 The Health Belief Model (HBM) is a widely used framework for investigating  
28  
29 112 psychosocial determinants of health behaviours[13] and is recognized as an  
30  
31 113 important predictor of influenza vaccination uptake[14]. The HBM proposes  
32  
33 114 that an individual's engagement in a specific preventative health behaviour is  
34  
35 115 predicated on the following constructs: i) perceived susceptibility to the illness, ii)  
36  
37 116 perceived likelihood of contracting the illness, iii) perceived seriousness of the  
38  
39 117 illness, iv) perceived barriers to engaging in the health behaviour, v) perceived  
40  
41 118 benefits of the health behaviour, vi) cues to engage in the health behaviour such  
42  
43 119 as advice from a healthcare practitioner and, vii) self-efficacy or the individual's  
44  
45 120 perception of their capability to engage or succeed in the behaviour. Additional  
46  
47 121 emotional constructs may modify the HBM. In particular, worry may modify the  
48  
49 122 impact of perceived risk of illness; a patient may perceive themselves to be at  
50  
51 123 risk, but unless this is something that worries them they may not engage in a  
52  
53  
54  
55  
56  
57  
58  
59  
60

1  
2  
3 124 preventative behaviour[15]. Furthermore, anticipated regret of illness if a health  
4  
5 125 behaviour is not performed is also recognized as a predictor of intent[16].  
6

7 126

8  
9 127 The objective of this study was to explore the sociodemographic factors, and the  
10  
11 128 vaccine and vaccination-specific health-beliefs that are associated with SIIV  
12  
13 129 intention amongst HSCT recipients, using a HBM modified with the additional  
14  
15 130 emotional constructs given above (mHBM). A better understanding of such  
16  
17 131 associations may allow development of targeted strategies that address issues  
18  
19 132 specific to this unique and complex patient group, with the aim of increasing  
20  
21 133 influenza vaccine uptake rates.  
22  
23

24 134

25 135 Participants and Methods

26 136

27 137 *Participants*

28 138

29 139 Patients were screened by HSCT nurse specialists for study eligibility during  
30  
31 140 routine outpatient appointments at 3 study sites in the United Kingdom between  
32  
33 141 June and September 2016. Eligible patients were aged 16 years or over and  
34  
35 142 recipients of autologous or allogeneic HSCT for any disease indication, with no  
36  
37 143 absolute contraindication to receiving the SIIV during the next influenza season,  
38  
39 144 and having not received the SIIV since transplant. All participants gave written  
40  
41 145 informed consent. The study was approved by the Health Research Authority  
42  
43 146 National Research Ethics Committee (Reference 16/WM/0144)  
44  
45

46 147

47 148 *Study Questionnaire and Health Belief Model*

48  
49  
50  
51  
52  
53  
54  
55  
56  
57  
58  
59  
60

1  
2  
3 149

4  
5 150 Participants completed a study-specific, anonymous, 42-item, paper-based  
6  
7 151 questionnaire.

8  
9 152

10  
11 153 Questions scoped type of HSCT (autologous or allogeneic), disease indication,  
12  
13 154 time from HSCT, pre-HSCT SIV receipt, and receipt of non-SIV vaccines since  
14  
15 155 HSCT. Sociodemographic questions established age, gender, ethnic background,  
16  
17 156 educational attainment, relationship status and residential circumstances.

18  
19  
20 157

21  
22 158 Intention to receive the SIV during the 2016-2017 influenza season, was  
23  
24 159 assessed by 2 statements phrased in the affirmative (I intend to receive the flu  
25  
26 160 vaccine next winter) and negative (I will choose not to receive the flu vaccine  
27  
28 161 next winter). Participants' agreement with each statement was expressed on 5-  
29  
30 162 point Likert scales ranging from strongly disagree to strongly agree.

31  
32  
33 163

34  
35 164 24 health belief statements were mapped to the mHBM with between 2 and 5  
36  
37 165 statements clustered around each construct (Table 1). Statements pertaining to  
38  
39 166 the cues to vaccination construct were phrased to explore perception of HSCT  
40  
41 167 team and GP knowledge of SIV in the context of HSCT. Participants' perceived  
42  
43 168 impact of a recommendation to receive the SIV from their HSCT team or GP was  
44  
45 169 explored. Statements about preferred vaccination location and ease of access to  
46  
47 170 services were also included. Again, participants' agreement with each statement  
48  
49 171 was expressed on 5-point Likert scales ranging from strongly disagree to  
50  
51 172 strongly agree.

52  
53  
54  
55 173

1  
2  
3 174 *Statistical Analysis*  
4

5 175  
6

7 176 Statistical analysis was performed with IBM SPSS version 24.  
8

9 177  
10

11 178 For the dependent variable vaccination intention, participants' agreement scores  
12

13 179 were summed and dichotomised to a 'high intent' group (intention score > than  
14

15 180 neutral value) and a 'low intent' group (intention score  $\leq$  to the neutral value).  
16

17 181  
18

19 182 Categorical patient characteristics and sociodemographic factors are reported as  
20

21 183 frequencies and percentages. Associations between these variables and SIIV  
22

23 184 intention was examined with Pearson's chi-squared test, and Fisher's exact test  
24

25 185 when expected values were less than 5.  
26

27 186  
28

29 187 Internal scale reliability for each cluster of mHBM construct statements was  
30

31 188 assessed using Cronbach's  $\alpha$ . A value of  $>0.6$  was considered indicative of  
32  
33  
34  
35  
36  
37  
38  
39  
40  
41  
42  
43  
44  
45  
46  
47  
48  
49  
50  
51  
52  
53  
54  
55  
56  
57  
58  
59  
60

189 *Table 1: Health belief statements grouped by construct with associated Cronbach's Alpha Value*

190

| <b>Health Belief Model Construct (Cronbach's Alpha)</b>                                                                                                            |
|--------------------------------------------------------------------------------------------------------------------------------------------------------------------|
| <b>1. Susceptibility to seasonal influenza (<math>\alpha = 0.83</math>)</b>                                                                                        |
| Now I have had a stem cell transplant I can catch the seasonal flu more easily than other people my age                                                            |
| Now I have had a stem cell transplant I can catch the seasonal flu more easily than before my transplant                                                           |
| <b>2. Likelihood of catching seasonal influenza (<math>\alpha = 0.91</math>)</b>                                                                                   |
| My chances of catching seasonal flu next winter will be high if I do not receive the seasonal flu vaccine                                                          |
| I am more likely than other people my age to catch seasonal flu next winter if I do not receive the seasonal flu vaccine                                           |
| Now I have had a stem cell transplant it is more likely that I will catch seasonal flu next winter if I do not receive the seasonal flu vaccine                    |
| <b>3. Severity of seasonal influenza infection (<math>\alpha = 0.91</math>)</b>                                                                                    |
| If I do not receive the seasonal flu vaccine and caught the seasonal flu next winter this would be a serious illness for me                                        |
| If I do not receive the seasonal flu vaccine and caught the seasonal flu next winter this would have a negative impact on my recovery from my stem cell transplant |
| If I do not receive the seasonal flu vaccine and caught the seasonal flu next winter I would become more unwell than other people my age                           |
| <b>4. Barriers to vaccination (<math>\alpha = 0.84</math>)</b>                                                                                                     |
| I am worried about side effects of the seasonal flu vaccine                                                                                                        |
| If I receive the seasonal flu vaccine next winter it may make me feel unwell with the flu or a flu-like illness                                                    |
| If I receive the seasonal flu vaccine next winter I am more likely to experience side effects than other people my age                                             |
| If I receive the seasonal flu vaccine next winter it may have a negative impact on my recovery from my stem cell transplant                                        |
| Now I have had a stem cell transplant the seasonal flu vaccine may not work as well for me as it does for other people my age                                      |
| <b>5. Benefits of vaccination (<math>\alpha = 0.66</math>)</b>                                                                                                     |
| If I receive the seasonal flu vaccine next winter it may help to prevent me from catching the seasonal flu                                                         |
| If I receive the seasonal flu vaccine next winter it may help to prevent me from passing the seasonal flu to other people around me                                |
| If I receive the seasonal flu vaccine next winter, but still catch the flu, it may help to prevent me from becoming seriously unwell                               |
| <b>6. Cues to vaccination (<math>\alpha = 0.76</math>)</b>                                                                                                         |



1  
2  
3  
4  
5  
6  
7 If my transplant team advised me to receive the seasonal flu vaccine next winter I would definitely have it

8 If my GP advised me to receive the seasonal flu vaccine next winter I would definitely have it

9 My GP understands my condition enough to know if the seasonal flu vaccine is right for me

10 My transplant team understand my condition enough to know if the seasonal flu vaccine is right for me

---

11 7.Worry ( $\alpha = 0.47$ )

---

12 If I receive the seasonal flu vaccine next winter I will worry less about catching the seasonal flu

13 The thought of catching seasonal flu next winter worries me

---

14 8.Self-efficacy ( $\alpha = 0.29$ )

---

15 I have enough information and am able to decide whether the seasonal flu vaccine is right for me

16 I would find it easy to attend my GP surgery next winter to receive the seasonal flu vaccine

---

17 9.Anticipated regret ( $\alpha = 0.15$ )

---

18 I would regret it if I decided not to receive the seasonal flu vaccine next winter and became unwell with seasonal flu

19 I would regret it if I decided to receive the seasonal flu vaccine next winter and became unwell with side effects

---

1  
2  
3 191 acceptable internal scale reliability [17]. Scale reliability was acceptable for  
4  
5 192 constructs 1-6 (Table 1) and statement scores were summed to give total  
6  
7 193 construct scores for each participant. Scale reliability was unacceptable for  
8  
9 194 constructs 7-9 (Table 1) therefore statements were analysed individually. All  
10  
11 195 construct scores were analysed as continuous scales, with zero representing a  
12  
13 196 neutral response (neither agree nor disagree). Mean agreement scores for low  
14  
15 197 and high intent groups are presented with 95% confidence intervals.  
16  
17

18  
19  
20 199 Participants' mean agreement scores for each mHBM construct were compared  
21  
22 200 between SIIV intention groups using Analysis of Variance (ANOVA).  
23  
24 201 Homogeneity of variances was confirmed with Levene's statistic. HSCT team and  
25  
26 202 GP cue scores *within* low and high intent groups were compared with a paired  
27  
28 203 sample T-Test.  
29  
30

31 204  
32  
33 205 The impact of sociodemographic variables and health belief constructs on  
34  
35 206 seasonal influenza vaccination intention was examined with hierarchical binary  
36  
37 207 logistic regression. Variables and constructs that were statistically significant in  
38  
39 208 univariate analysis were included as separate regression blocks. Statistically  
40  
41 209 significant variables that improved the predictive value ( $p < 0.05$  for the  
42  
43 210 regression block) were included in the final model.  
44  
45

46  
47 211  
48  
49 212 The assumption of a linear relationship between each independent variable and  
50  
51 213 log of the outcome variable was tested and confirmed using the Box-Tidwell  
52  
53 214 procedure[18]. Multicollinearity across all constructs was assessed. No variance  
54  
55  
56  
57  
58  
59  
60

1  
2  
3 215 inflation factor was greater than 10, and the mean of values was acceptable at  
4  
5 216 1.92[19].  
6

7 217

8  
9 218 There were 10 missing data points from 6 participants across the study. These  
10  
11 219 were all responses to mHBM statements from the high intent group. Summed  
12  
13 220 agreement scores were not calculated for that participant for the affected HBM  
14  
15 221 construct only.  
16

17  
18 222 *Patient and Public Involvement*  
19

20 223

21  
22 224 The study questionnaire was developed with the involvement of volunteers from  
23  
24 225 the Anthony Nolan patients and families panel. Using an initial draft  
25  
26 226 questionnaire, think-aloud sessions were conducted to ensure that the  
27  
28 227 questionnaire was clear, easy to understand, that interpretation of each question  
29  
30 228 was as intended, and that answers were consistent with the question asked.  
31

32  
33 229 Volunteers were also asked for their overall feedback on the study questionnaire.  
34

35  
36 230 The revised questionnaire was then piloted with volunteer patients who were  
37  
38 231 asked to complete the questionnaire, keeping note of the time taken, and to  
39  
40 232 highlight any questions that they had difficulty answering or otherwise found  
41  
42 233 problematic. The questionnaires were all completed within 10 minutes and no  
43  
44 234 participants reported difficulty or concerns about the questions. Results will be  
45  
46 235 disseminated to study participants through their transplant teams, and made  
47  
48 236 available to participants through open access publication.  
49

50  
51 237

52  
53 238

54  
55 239  
56  
57  
58  
59  
60

## 240 Results

241

242 *Patient Characteristics*

243

244 Characteristics of 93 study participants are given in Table 2. 78.5% were

245 recipients of allogeneic HSCT and the most frequent disease indication was acute

246 myeloid leukaemia (AML) (28.0%). The majority (68.6%) were within the first 6

247 months post HSCT. 40.9% of participants had received the SIIV before HSCT, and

248 4.3% had received a non-influenza vaccine since HSCT. 52.7% of participants

249 were male, and most (84.9%) were of a white ethnic group.

250

251 *SIIV vaccination intention for 2016-2017 influenza season*

252

253 71 (76.3%) participants expressed high SIIV intent, while 22 (23.7%) expressed

254 low SIIV intent.

255

256

257 *Table 2: Characteristics of n=93 study participants. \*Statistically Significant (p<0.05)*

258

| Characteristic, n=93 | n(%)      | high SIIV Intent<br>n(%) | p     |
|----------------------|-----------|--------------------------|-------|
| <b>Gender</b>        |           |                          |       |
| Male                 | 49 (52.7) | 40 (81.6)                |       |
| Female               | 44 (47.3) | 31 (70.5)                | 0.23  |
| <b>Age group</b>     |           |                          |       |
| 16-34                | 22 (23.7) | 15 (68.2)                |       |
| 35-54                | 36 (38.7) | 33 (91.7)                |       |
| 55-64                | 20 (21.5) | 15 (75)                  |       |
| 65+                  | 15 (16.1) | 8 (53.5)                 | 0.02* |

|                                        |           |           |       |
|----------------------------------------|-----------|-----------|-------|
| <b>HSCT Type</b>                       |           |           |       |
| Allogeneic                             | 73 (78.5) | 59 (80.8) |       |
| Autologous                             | 20 (21.5) | 15 (75)   | 0.78  |
| <b>Disease Indication</b>              |           |           |       |
| Acute lymphoblastic leukaemia (ALL)    | 11 (11.8) | 8(72.7)   |       |
| Acute myeloid leukaemia (AML)          | 26 (28.0) | 20 (76.9) |       |
| Aplastic Anaemia (AA)                  | 5 (5.4)   | 3 (60)    |       |
| Chronic myeloid leukaemia (CML)        | 5 (5.4)   | 5 (100)   |       |
| Hodgkin Lymphoma                       | 9 (9.7)   | 9 (88.9)  |       |
| Myelodysplastic syndrome (MDS)         | 5 (5.4)   | 3 (60)    |       |
| Myelofibrosis (MF)                     | 2 (2.2)   | 1 (50)    |       |
| Multiple myeloma (MM)                  | 22 (23.7) | 17 (77.3) |       |
| Non-Hodgkin Lymphoma (NHL)             | 8 (8.6)   | 6 (75)    | 0.79  |
| <b>months from HSCT</b>                |           |           |       |
| 0-6                                    | 64 (68.8) | 52 (81.3) |       |
| >6-12                                  | 20 (21.5) | 14 (70)   |       |
| > 12                                   | 9 (9.7)   | 5 (55.6)  | 0.18  |
| <b>SIIV before HSCT</b>                |           |           |       |
| Yes                                    | 38 (40.9) | 34(89.5)  |       |
| No                                     | 55 (59.1) | 37 (67.3) | 0.01* |
| <b>Any non-SIIV vaccine since HSCT</b> |           |           |       |
| Yes                                    | 4 (4.3)   | 4 (100)   |       |
| No                                     | 89 (95.7) | 67 (75.3) | 0.26  |
| <b>Ethnicity</b>                       |           |           |       |
| White                                  | 79 (84.9) | 69 (77.2) |       |
| Asian                                  | 8 (8.6)   | 7 (87.5)  |       |
| Black                                  | 3 (3.2)   | 2 (66.7)  |       |
| Mixed                                  | 2 (2.2)   | 1 (50)    |       |
| Other                                  | 1 (1.1)   | 0 (0)     | 0.32  |
| <b>Educational Background</b>          |           |           |       |
| Higher Education                       | 30 (32.3) | 24 (80)   |       |
| Secondary Education                    | 49 (52.7) | 40 (81.6) |       |
| Other                                  | 3 (3.2)   | 2 (66.7)  |       |
| Prefer not to answer                   | 11 (11.8) | 5 (45.5)  | 0.07  |
| <b>Living Circumstances</b>            |           |           |       |
| Renting                                | 25 (26.9) | 33 (76)   |       |
| Home Owner                             | 54 (58.1) | 43 (79.6) |       |
| Other                                  | 10 (10.8) | 7(70)     |       |
| Prefer not to answer                   | 4 (4.7)   | 2 (50)    | 0.56  |
| <b>Relationship Status</b>             |           |           |       |
| Single                                 | 23 (24.7) | 18 (78.3) |       |
| Married / Cohabiting                   | 56(60.2)  | 45 (80.4) |       |
| Divorced / Separated                   | 10 (10.8) | 5 (50)    |       |
| Prefer not to answer                   | 4 (4.4)   | 3 (75)    | 0.22  |

1  
2  
3 260 *Sociodemographic and Transplant Variables*  
4

5 261

6  
7 262 There was a statistically significant difference in SIIV intention between age  
8  
9 263 groups (Table 2). Rate of high intent was greatest in the 35-54 age group at  
10  
11 264 91.7%, and lowest at 53.3% in the 65+ age group. There was no statistically  
12  
13 265 significant difference in gender, ethnicity, educational background, living  
14  
15 266 circumstance, or relationship status between SIIV intention groups.  
16  
17

18 267

19  
20 268 There was no difference in type of HSCT or disease indication between SIIV  
21  
22 269 intention groups. 81.3% of participants answering within the first 0-6 months  
23  
24 270 post HSCT had high intent, compared with 70% in those answering at 6-12  
25  
26 271 months, and 55.6% among those answering at >12 months from HSCT, however  
27  
28 272 this finding was not statistically significant. To determine whether there was a  
29  
30 273 difference in health beliefs between participants at different time points post  
31  
32 274 HSCT, mean agreement scores for all constructs were compared. There was no  
33  
34 275 difference in mean agreement scores between participants at 0-6 and 6-12  
35  
36 276 and >12 months post HSCT.  
37  
38

39 277

40  
41  
42 278 There was no association between SIIV intention and receipt of any non-  
43  
44 279 influenza vaccine since HSCT. However, of those who had received the SIIV prior  
45  
46 280 to HSCT 81.3% had high intent compared with 67.3% of those who had not .  
47  
48

49 281

50  
51 282 *Health Belief Model Constructs*  
52

53 283  
54  
55  
56  
57  
58  
59  
60

284 In univariate analysis, comparing mean construct agreement scores between  
 285 SIIV intention groups, participants in the high intent group perceived greater  
 286 susceptibility to influenza, a greater likelihood of contracting influenza and  
 287 perceived influenza to be a more severe illness (Table 3). They also perceived  
 288 greater potential benefit from vaccination, and fewer barriers to vaccination.  
 289 Although the two groups expressed similar levels of worry about catching  
 290 influenza, participants in the high intent group felt they would worry less about  
 291 catching influenza if vaccinated compared with the low intent group. They also  
 292 expressed greater concern about anticipated regret if they caught influenza  
 293 having not been vaccinated. Level of anticipated regret of experiencing side  
 294 effects if vaccinated was similarly low across the two groups. Participants in the  
 295 high intent group felt more strongly that they had enough information to make  
 296 decisions about vaccination and that it would be easy to attend their general  
 297 practice surgery for vaccination.

298  
 299 *Table 3: Mean agreement score values for health belief constructs for low and high*  
 300 *SIIV intent groups. <sup>a</sup>n=68, <sup>b</sup>n=69, <sup>c</sup>n=70*

| Health Belief Model Construct                | Low SIIV Intent<br>(n=22) | High SIIV intent<br>(n=71)             | p      |
|----------------------------------------------|---------------------------|----------------------------------------|--------|
| 1. Susceptibility to seasonal influenza      | 0.05 (-0.70 to 0.70)      | 2.09 (1.75 to 4.39)                    | <0.001 |
| 2. Likelihood of catching seasonal influenza | -0.45 (-1.39 to 0.40)     | 2.58 (2.00 to 3.18)<br><sup>b</sup>    | <0.001 |
| 3. Severity of Seasonal influenza infection  | 0.77 (-0.17 to 1.72)      | 2.65 (2.09 to 3.23)<br><sup>b</sup>    | 0.002  |
| 4. Barriers to vaccination                   | 1.27 (0.11 to 2.44)       | -1.55 (-2.34 to -0.80)<br><sup>a</sup> | 0.001  |
| 5. Benefits of vaccination                   | -0.05 (0.00 to 1.78)      | 2.56 (2.13 to 3.00)                    | <0.001 |
| 6. Cues to Vaccination                       |                           |                                        |        |
| HSCT team understands my condition           | 1.14 (0.55 to 1.32)       | 1.63 (1.52 to 1.75)                    | <0.001 |

|    |                       |                                                     |                       |                                         |
|----|-----------------------|-----------------------------------------------------|-----------------------|-----------------------------------------|
| 1  |                       |                                                     |                       |                                         |
| 2  |                       |                                                     |                       |                                         |
| 3  |                       | GP understands my condition                         | -0.32 (0.83 to 0.13)  | 0.59 (0.55 to 0.83) <sup>c</sup> <0.001 |
| 4  |                       |                                                     |                       |                                         |
| 5  | 7. Worry              |                                                     |                       |                                         |
| 6  |                       | About catching influenza                            | 0.14 (-0.43 to 0.71)  | 0.39 (0.17 to -0.63) 0.34               |
| 7  |                       |                                                     |                       |                                         |
| 8  |                       | Less about catching influenza if vaccinated         | -0.23 (0.60 to 0.07)  | 0.80 (0.61 to 1.00) <0.001              |
| 9  |                       |                                                     |                       |                                         |
| 10 | 8. Self-efficacy      |                                                     |                       |                                         |
| 11 |                       |                                                     |                       |                                         |
| 12 |                       | Have enough information to decide about vaccination | 0.14 (-0.32 to 0.58)  | 0.81 (0.61 to 1.00) 0.007               |
| 13 |                       |                                                     |                       |                                         |
| 14 |                       | Would find it easy to attend GP for vaccination     | 0.32 (-0.12 to 1.72)  | 1.10 (1.89 to 2.00) <0.001              |
| 15 |                       |                                                     |                       |                                         |
| 16 | 9. Anticipated regret |                                                     |                       |                                         |
| 17 |                       |                                                     |                       |                                         |
| 18 |                       | of catching flu if not vaccinated                   | 0.27 (-0.21 to 0.74)  | 1.35 (1.18-1.52) <0.001                 |
| 19 |                       |                                                     |                       |                                         |
| 20 |                       | of side effects if vaccinated                       | -0.09 (-0.15 to 0.37) | 0.13 (-0.12 to 0.39) 0.4                |
| 21 |                       |                                                     |                       |                                         |
| 22 |                       |                                                     |                       |                                         |
| 23 |                       |                                                     |                       |                                         |
| 24 | 301                   |                                                     |                       |                                         |
| 25 | 302                   |                                                     |                       |                                         |
| 26 | 303                   |                                                     |                       |                                         |
| 27 | 304                   |                                                     |                       |                                         |
| 28 | 305                   |                                                     |                       |                                         |
| 29 | 306                   |                                                     |                       |                                         |
| 30 | 307                   |                                                     |                       |                                         |
| 31 | 308                   |                                                     |                       |                                         |
| 32 | 309                   |                                                     |                       |                                         |
| 33 | 310                   |                                                     |                       |                                         |
| 34 | 311                   |                                                     |                       |                                         |
| 35 | 312                   |                                                     |                       |                                         |
| 36 | 313                   |                                                     |                       |                                         |
| 37 | 314                   |                                                     |                       |                                         |
| 38 | 315                   |                                                     |                       |                                         |

301

302

303

304 A multivariate regression model (Table 4) was statistically significant when

305 compared with a constant only model indicating that this set of variables and

306 constructs distinguishes reliably between HSCT recipients who express low and

307 high SIIV intent. There was a moderately strong relationship with 74.7%

308 (Nagelkerke R<sup>2</sup>) of variation in vaccination intention explained by the overall

309 model. GP and HSCT Team cues to vaccination, self-efficacy and anticipated

310 regret constructs did not significantly improve predictive value and so were not

311 included in the final model. Age and pre-HSCT SIIV vaccination receipt remained

312 independent predictors of SIIV intention, with those aged >65 and those who had

313 not received SIIV before HSCT more likely to be in the low intent group. A

314 greater perceived benefit of vaccination was the strongest predictor of being in

315 the high intent group. Although the constructs susceptibility to influenza,



1  
2  
3 316 likelihood of contracting influenza, severity of influenza infection, barriers to  
4  
5 317 vaccination and worry about catching influenza improved the predictive value of  
6  
7 318 the overall multivariate model, they did not independently predict vaccination  
8  
9 319 intention.

320

321

322

323

324

325

326

327 *Table 4 Multivariate logistic regression model predicting odds of high SIIV intent.*

328 *Overall model was statistically significant compared with a constant only model*

329 *( $p < 0.001$ ). \*Statistically significant independent predictor ( $p < 0.05$ )*

330

| Variable                                                   | Odds Ratio of high SIIV Intent (95% CI) | p     |
|------------------------------------------------------------|-----------------------------------------|-------|
| Age >65                                                    | 0.02 (0.01-0.57)                        | 0.02* |
| No SIIV before HSCT                                        | 0.04 (0.02-0.56)                        | 0.02* |
| Benefits of vaccination                                    | 2.96 (1.29-6.81)                        | 0.01* |
| Susceptibility to seasonal Influenza                       | 0.96 (0.33-2.78)                        | 0.64  |
| Likelihood of catching seasonal influenza                  | 1.68 (0.86-3.26)                        | 0.13  |
| Severity of seasonal influenza infection                   | 0.69 (0.39-1.21)                        | 0.20  |
| Barriers to vaccination                                    | 0.69 (0.57-0.99)                        | 0.05  |
| Worry less about catching seasonal influenza if vaccinated | 4.99 (1.01-24.77)                       | 0.05  |

331

1  
2  
3 332

4  
5 333 *Cues to Vaccination and Preferred Vaccination Location*

6  
7 334

8  
9 335 Considering their HSCT team and GPs, both high and low intent groups agreed  
10  
11 336 more strongly with statements that their HSCT team understands their condition  
12  
13 337 enough to know if the influenza vaccine is right for them. Patients were also  
14  
15 338 asked how much they agreed with the statement that they would definitely have  
16  
17 339 the vaccine if their GP or HSCT team recommended it. Agreement scores were  
18  
19 340 dichotomized to low agreement ( $\leq$  neutral value) and high agreement ( $>$ neutral  
20  
21 341 value). Of those 22 patients with low intent, 90% agreed that they would receive  
22  
23 342 the vaccine if their HSCT Team recommended it, and only 22.7% if their GP  
24  
25 343 recommended it, compared with 98.6% and 90.0% respectively in the high  
26  
27 344 intent group.

28  
29  
30  
31 345

32  
33 346 Participant responses to the statement *I would prefer to have the seasonal*  
34  
35 347 *influenza vaccine next winter at my transplant centre instead of my GP surgery*  
36  
37 348 were categorized into prefers HSCT centre, prefers GP surgery or no preference.  
38  
39 349 Of the low intent group, over half (54.5%) favoured vaccination at their HSCT  
40  
41 350 centre, with only a minority (4.5%) favouring vaccination at their GP surgery. Of  
42  
43 351 those with high intent 43.7% favoured vaccination at their HSCT programme,  
44  
45 352 compared with 29.6% at their GP surgery although these findings did not reach  
46  
47 353 statistical significance ( $p=0.05$ ).

48  
49  
50  
51 354

52  
53 355 Discussion

54  
55 356

1  
2  
3 357 To our knowledge, this is the first study to explore sociodemographic factors and  
4  
5 358 psychological determinants of SIIV intention amongst HSCT recipients. Patients  
6  
7 359 from 3 geographically dispersed study sites completed anonymous  
8  
9 360 questionnaires. Approximately a quarter of participants expressed low SIIV  
10  
11 361 intent. While this is in keeping with previously reported SIIV uptake rates of 60-  
12  
13 362 70% [8,9], the small absolute number of participants expressing low SIIV intent  
14  
15 363 in our study may bias our data. Participants' SIIV uptake during the 2016-2017  
16  
17 364 UK influenza season was not evaluated, and uptake in this cohort may not be  
18  
19 365 equivalent to intent rates reported here.  
20  
21  
22  
23

24  
25 366  
26  
27 367 Constructs of a mHBM were significant determinants of SIIV intention.  
28  
29 368 Strategies tailored to a population and their specific concerns are the most  
30  
31 369 effective at improving knowledge and changing attitudes towards vaccination,  
32  
33 370 and increasing vaccine uptake[20]. Based on our findings, the mHBM may  
34  
35 371 provide a useful framework for structuring strategies to address low SIIV intent  
36  
37 372 in the HSCT population. Exploring HSCT recipients increased risk of influenza,  
38  
39 373 both in terms of susceptibility and severity, discussing the potential benefits of  
40  
41 374 vaccination, and exploring concerns around side effects may help to promote  
42  
43 375 vaccine intent and uptake.  
44

45 376  
46  
47 377 A strong association between past vaccination behaviours and future vaccination  
48  
49 378 intent has been reported[21]. Previous influenza vaccination has been  
50  
51 379 associated with high intent or uptake in all at risk groups [22,23] and cancer  
52  
53 380 patients[24] and our findings accord with this. It may therefore be helpful to  
54  
55  
56  
57  
58  
59  
60

1  
2  
3 381 explore recipients pre-HSCT SIV behaviour and discussion rationale for refusal  
4  
5 382 where appropriate.  
6  
7 383  
8  
9 384 It was reassuring to find that none of gender, ethnicity, educational background,  
10  
11 385 living circumstances or relationship status were associated with vaccine  
12  
13 386 hesitancy in this study. However, vaccination intention did vary with age. High  
14  
15 387 intent was greatest at 91.7% in the 35-53 age bracket, but of concern, fell in  
16  
17 388 those over 65 to 53.5%, which is below the 2015-2016 uptake rate of 71% in the  
18  
19 389 equivalent UK general population age-group[25]. Older age has been reported as  
20  
21 390 a barrier to vaccination in a cohort of oncology patients, including some with  
22  
23 391 haematological malignancy [24]. However, a French study of patients with  
24  
25 392 secondary immunodeficiency, including haematological disorders, reported  
26  
27 393 higher vaccination rates in those aged over 65 compared with younger  
28  
29 394 patients[26]. In a UK study, older age was found to be a predictor of uptake of the  
30  
31 395 2009 pandemic influenza A vaccine amongst high-risk adults[27]. A meta-  
32  
33 396 analysis of international studies found inconsistent association between age and  
34  
35 397 vaccination intent and uptake in the general public, older patients, and those  
36  
37 398 with chronic disease [21]. It is not apparent from these studies why age impacts  
38  
39 399 on intent, and there are likely to be a range of social, psychological, financial and  
40  
41 400 healthcare access issues specific to each study population. Our findings highlight  
42  
43 401 a specific age group in whom intent is low and may benefit from targeted  
44  
45 402 intervention. Further evaluation of this finding and exploration of underlying  
46  
47 403 determinants is warranted.  
48  
49 404  
50  
51  
52  
53  
54  
55  
56  
57  
58  
59  
60

1  
2  
3 405 High SIIV intent was greatest in those recipients within the first 0-6 months'  
4  
5 406 post-HSCT (81.3%) and lowest at more than 12 months (55.6%) although this  
6  
7 407 finding was not statistically significant. Longer time from HSCT may be  
8  
9 408 associated with a change in perceived risk of infection, or concern about vaccine  
10  
11 409 side effects or efficacy; however, we did not detect any statistically significant  
12  
13 410 difference in health beliefs at 0-6, 6-12 and > 12 months from HSCT. This finding  
14  
15 411 suggests there is a need for reinforcement of SIIV intent from healthcare  
16  
17 412 professionals throughout and beyond the first-year post HSCT.  
18  
19  
20  
21 413

22  
23 414 In both vaccine intention groups, patients expressed greater confidence in their  
24  
25 415 HSCT team than their GP, with respect to understanding of whether the influenza  
26  
27 416 vaccine is right for them. Fewer patients felt that a recommendation from their  
28  
29 417 GP would prompt them to receive the SIIV compared with if their HSCT Team  
30  
31 418 made the recommendation. This was most marked in the low intent group.

32  
33 419 These findings suggest that cues from the HSCT team are important in promoting  
34  
35 420 vaccination amongst HSCT recipients, and particularly for those with low intent.

36  
37  
38 421 Cues from healthcare providers are considered a key factor in promoting  
39  
40 422 vaccination[21] and a study of Israeli cancer patients identified recommendation  
41  
42 423 from an oncologist as a significant predictor of vaccine uptake [24]. Our findings  
43  
44 424 accord with this, and suggest that HSCT recipients value the advice of their  
45  
46 425 specialist team. This highlights the importance of HSCT specialists engaging in  
47  
48 426 discussion with patients about influenza vaccination. Preference for vaccination  
49  
50 427 at HSCT centres rather than GP surgeries was similar at 43.7% and 54.5% in low  
51  
52 428 and high intent groups respectively. In the high intent group, more patients  
53  
54 429 expressed a preference for vaccination at their GP surgery than in the low intent  
55  
56  
57  
58  
59  
60

1  
2  
3 430 group. For approximately 50% of those HSCT recipients with both low and high  
4  
5 431 intent, access to an SIIV service at HSCT centres may facilitate vaccination uptake  
6  
7 432  
8  
9 433 None of the transplant variables assessed were associated with SIIV intention.  
10  
11 434 Current influenza vaccination guidelines are standardized for all HSCT recipients  
12  
13 435 as evidence is insufficient to recommend modification according to donor type,  
14  
15 436 stem cell source or conditioning[4,5]. Influenza infections are reported to occur  
16  
17 437 with higher frequency in allogeneic compared with autologous HSCT recipients  
18  
19 438 [28,29] and may have a higher associated morbidity and mortality[30] although  
20  
21 439 this latter finding has not been consistently reported[1]. There was no  
22  
23 440 difference in vaccination intention between autologous and allogeneic HSCT  
24  
25 441 recipients. This suggests the unique aspects of allogeneic HSCT, principally GvHD  
26  
27 442 and the need for immunosuppressive therapy, do not contribute to increased  
28  
29 443 influenza vaccination intention in this group compared with autoHSCT recipients.  
30  
31  
32  
33  
34  
35

#### 36 445 Conclusion

37 446  
38  
39  
40 447 Our data indicate that the constructs of a mHBM are important determinants of  
41  
42 448 SIIV intention in the HSCT recipient population. These constructs may be used to  
43  
44 449 develop interventions addressing low SIIV intent For example, SIIV uptake  
45  
46 450 amongst HSCT recipients may be promoted by public health authorities and  
47  
48 451 patient support groups with messages adapted from our findings. Future  
49  
50 452 prospective studies to investigate the efficacy of such intervention are warranted.  
51  
52 453 HSCT recipients strongly value the expertise and recommendation of their  
53  
54 454 transplant team, and we would encourage practitioners to discuss SIIV intention  
55  
56  
57  
58  
59  
60

1  
2  
3 455 with all patients as a routine and important aspect of post-transplant care.  
4  
5 456 Furthermore, those aged over 65, and those who had not received the SIIV prior  
6  
7 457 to HSCT were particularly likely to have low intent and may be target groups.  
8  
9 458 Local provision of vaccination services at HSCT centres may serve as an  
10  
11 459 additional promoter for a proportion of patients and this would require  
12  
13 460 allocation of resources from health commissioners.  
14  
15  
16 461

#### 17 18 462 Acknowledgements

19  
20 463 The authors would like to thank the volunteers who contributed to the  
21  
22 464 development of the study questionnaire. The authors also wish to thank the  
23  
24 465 stem cell transplant recipients who participated in the study.  
25  
26  
27 466

#### 28 29 467 Authorship Statement

30  
31 468  
32  
33 469 Paul D E Miller, Alice S Forster, Thushan I de Silva, Karl Peggs, Alejandro  
34  
35 470 Madrigal and John A Snowden all contributed substantially to the design,  
36  
37 471 analysis, and interpretation of data. Hayley Leonard, Chloe Anthias, Michaela  
38  
39 472 Mayhew, Matthias Klammer, Erin Hurst and Susan Paskar all contributed  
40  
41 473 substantially to the acquisition of data. All authors contributed to drafting the  
42  
43 474 work and/or revising it critically for intellectual content. All authors gave final  
44  
45 475 approval of the version to be published.  
46  
47  
48 476

#### 49 50 51 477 Data sharing statement

52  
53 478  
54  
55  
56  
57  
58  
59  
60

1  
2  
3 479 The study dataset will be made available via Dryad repository and DOI provided  
4  
5 480 following editorial review  
6

7 481

8  
9 482 References  
10

11 483

12  
13  
14 484 1 Nichols WG, Guthrie K a, Corey L, *et al.* Influenza infections after

15 485 hematopoietic stem cell transplantation: risk factors, mortality, and the

16 486 effect of antiviral therapy. *Clin Infect Dis* 2004;**39**:1300–6.

17 487 doi:10.1086/425004

18  
19  
20 488 2 Whimbey E, Elting LS, Couch RB, *et al.* Influenza A virus infections among

21 489 hospitalized adult bone marrow transplant recipients. *Bone Marrow*

22 490 *Transplant* 1994;**13**:437–40.

23  
24  
25 491 3 Shah DP, Ghantaji SS, Mulanovich VE, *et al.* Management of respiratory

26 492 viral infections in hematopoietic cell transplant recipients. 2012;**2**:203–18.

27 493 4 Rubin LG, Levin MJ, Ljungman P, *et al.* 2013 IDSA clinical practice guideline

28 494 for vaccination of the immunocompromised host. *Clin Infect Dis*

29 495 2014;**58**:1–57. doi:10.1093/cid/cit684

30  
31  
32 496 5 Tomblyn M, Chiller T, Einsele H, *et al.* Guidelines for preventing infectious

33 497 complications among hematopoietic cell transplantation recipients: a

34 498 global perspective. Preface. *Bone Marrow Transplant* 2009;**15**:1143–238.

35 499 doi:10.1038/bmt.2009.254

36  
37  
38 500 6 Snowden JA, Greenfield DM, Bird JM, *et al.* Guidelines for screening and

39 501 management of late and long-term consequences of myeloma and its

40 502 treatment. *Br J Haematol* 2017;**176**:888–907. doi:10.1111/bjh.14514

41 503 7 Miller PDE, de Silva TI, Skinner R, *et al.* Routine vaccination practice after



- 1  
2  
3 504 adult and paediatric allogeneic haematopoietic stem cell transplant: a  
4  
5 505 survey of UK NHS programmes. *Bone Marrow Transplant* 2017;**52**:775–7.  
6  
7 506 doi:10.1038/bmt.2016.362  
8  
9 507 8 Leonard H, Anthias C. Improving the re-vaccination programme for  
10  
11 508 patients post allograft. *Bone Marrow Transplant* 2015;**50**:216–7.  
12  
13 509 doi:10.1038/sj.bmt.1703986  
14  
15  
16 510 9 Meiring J, de Silva TI, Snowden JA. A study of adherence to a vaccination  
17  
18 511 schedule following adult allogeneic haematopoietic stem cell transplants  
19  
20 512 in UK transplant centre. *Bone Marrow Transplant* 2015;**50**:s203–4.  
21  
22  
23 513 10 Ambati A, Boas LS V, Ljungman P, *et al.* Evaluation of pretransplant  
24  
25 514 influenza vaccination in hematopoietic SCT: A randomized prospective  
26  
27 515 study. *Bone Marrow Transplant* 2015;**50**:858–64.  
28  
29 516 doi:10.1038/bmt.2015.47  
30  
31 517 11 Machado CM, Cardoso MR a, da Rocha IF, *et al.* The benefit of influenza  
32  
33 518 vaccination after bone marrow transplantation. *Bone Marrow Transplant*  
34  
35 519 2005;**36**:897–900. doi:10.1038/sj.bmt.1705159  
36  
37  
38 520 12 Ariza-Heredia EJ, Gulbis AM, Stolar KR, *et al.* Vaccination guidelines after  
39  
40 521 hematopoietic stem cell transplantation: practitioners' knowledge,  
41  
42 522 attitudes, and gap between guidelines and clinical practice. *Transpl Infect*  
43  
44 523 *Dis* 2014;**16**:878–86. doi:10.1111/tid.12312  
45  
46  
47 524 13 Rosenstock IM. Why People Use Health Services. *Milbank Q* 1966;**44**:1107–  
48  
49 525 8.  
50  
51 526 14 Brewer NT, Chapman GB, Gibbons FX, *et al.* Meta-analysis of the  
52  
53 527 relationship between risk perception and health behavior: the example of  
54  
55 528 vaccination. *Health Psychol* 2007;**26**:136–45. doi:10.1037/0278-

- 1  
2  
3 529 6133.26.2.136  
4  
5 530 15 Chapman GB, Coups EJ. Emotions and preventive health behavior: worry,  
6  
7 531 regret, and influenza vaccination. *Health Psychol* 2006;**25**:82–90.  
8  
9 532 doi:10.1037/0278-6133.25.1.82  
10  
11 533 16 Abraham C, Sheeran P. Acting on intentions: The role of anticipated regret.  
12  
13 534 *Br J Soc Psychol* 2003;**42**:495–511.  
14  
15  
16 535 17 Panayides P. Coefficient Alpha: Interpret With Caution. *Eur J Psychol*  
17  
18 536 2013;**9**:687–96. doi:10.5964/ejop.v9i4.653  
19  
20 537 18 Box GEP, Tidwell PW. Transformation of the Independent Variables.  
21  
22 538 *Technometrics* 1962;**4**:531–50.  
23  
24  
25 539 19 Field A. *Discovering Statistics Using IBM SPSS Statistics*. Fourth. Sage 2014.  
26  
27 540 20 Jarrett C, Wilson R, O’Leary M, *et al*. Strategies for addressing vaccine  
28  
29 541 hesitancy - A systematic review. *Vaccine* 2015;**33**:4180–90.  
30  
31 542 doi:10.1016/j.vaccine.2015.04.040  
32  
33  
34 543 21 Schmid P, Rauber D, Betsch C, *et al*. Barriers of Influenza Vaccination  
35  
36 544 Intention and Behavior - A Systematic Review of Influenza Vaccine  
37  
38 545 Hesitancy, 2005 - 2016. *PLoS One* 2017;**12**:1–46.  
39  
40 546 22 Nagata JM, Hernández-Ramos I, Kurup a S, *et al*. Social determinants of  
41  
42 547 health and seasonal influenza vaccination in adults ≥65 years: A  
43  
44 548 systematic review of qualitative and quantitative data. *BMC Public Health*  
45  
46 549 2013;**13**:1–25.  
47  
48  
49 550 23 Yeung MPS, Lam FLY, Coker R. Factors associated with the uptake of  
50  
51 551 seasonal influenza vaccination in adults: a systematic review. *J Public*  
52  
53 552 *Health (Bangkok)* 2016;**38**:746–53. doi:10.1093/pubmed/fdv194  
54  
55  
56 553 24 Vinograd I, Baslo R, Farbman L, *et al*. Factors associated with influenza

- 1  
2  
3 554 vaccination among adult cancer patients : a case – control study. *Clin*  
4  
5 555 *Microbiol Infect* 2014;**20**:899–905. doi:10.1111/1469-0691.12625  
6  
7 556 25 NHS England. The National Flu Immunisation Programme 2016/2017.  
8  
9 557 2016.https://www.gov.uk/government/uploads/system/uploads/attach  
10  
11 558 ment\_data/file/529954/Annual\_flu\_letter\_2016\_2017.pdf (accessed 22  
12  
13 559 Feb 2017).
- 14  
15  
16 560 26 Loubet P, Kernéis S, Groh M, *et al*. Attitude, knowledge and factors  
17  
18 561 associated with influenza and pneumococcal vaccine uptake in a large  
19  
20 562 cohort of patients with secondary immune deficiency. *Vaccine*  
21  
22 563 2015;**33**:3703–8. doi:10.1016/j.vaccine.2015.06.012  
23  
24  
25 564 27 Myers LB, Goodwin R. Using a theoretical framework to determine adults’  
26  
27 565 intention to vaccinate against pandemic swine flu in priority groups in the  
28  
29 566 UK. *Public Health* 2012;**126**:S53–6. doi:10.1016/j.puhe.2012.05.024  
30  
31 567 28 Hassan I a, Chopra R, Swindell R, *et al*. Respiratory viral infections after  
32  
33 568 bone marrow/peripheral stem-cell transplantation: the Christie hospital  
34  
35 569 experience. *Bone Marrow Transplant* 2003;**32**:73–7.  
36  
37 570 doi:10.1038/sj.bmt.1704048  
38  
39  
40 571 29 Ljungman P, Ward KN, Crooks BN a, *et al*. Respiratory virus infections after  
41  
42 572 stem cell transplantation : a prospective study from the Infectious  
43  
44 573 Diseases Working Party of the European Group for Blood and Marrow  
45  
46 574 Transplantation Summary : *Bone Marrow Transplant* 2001;**28**:479–84.  
47  
48  
49 575 30 Martino R, Porrás RP, Rabella N, *et al*. Prospective Study of the Incidence,  
50  
51 576 Clinical Features, and Outcome of Symptomatic Upper and Lower  
52  
53 577 Respiratory Tract Infections by Respiratory Viruses in Adult Recipients of  
54  
55 578 Hematopoietic Stem Cell Transplants for Hematologic Malignancies. *Biol*

1  
2  
3 579  
4  
5 580  
6  
7 581  
8  
9  
10  
11  
12  
13  
14  
15  
16  
17  
18  
19  
20  
21  
22  
23  
24  
25  
26  
27  
28  
29  
30  
31  
32  
33  
34  
35  
36  
37  
38  
39  
40  
41  
42  
43  
44  
45  
46  
47  
48  
49  
50  
51  
52  
53  
54  
55  
56  
57  
58  
59  
60

*Blood Marrow Transpl* 2005;**11**:781–96.  
doi:10.1016/j.bbmt.2005.07.007.Prospective

For peer review only

# BMJ Open

## Sociodemographic and psychological determinants of influenza vaccine intention amongst recipients of autologous and allogeneic haematopoietic stem cell transplant: a cross-sectional survey of UK transplant recipients using a modified health belief model.

|                                 |                                                                                                                                                                                                                                                                                                                                                                                                                                                                                                                                                                                                                                                                                                                                                                                                                                                                                                                                                                                                                                                                                                  |
|---------------------------------|--------------------------------------------------------------------------------------------------------------------------------------------------------------------------------------------------------------------------------------------------------------------------------------------------------------------------------------------------------------------------------------------------------------------------------------------------------------------------------------------------------------------------------------------------------------------------------------------------------------------------------------------------------------------------------------------------------------------------------------------------------------------------------------------------------------------------------------------------------------------------------------------------------------------------------------------------------------------------------------------------------------------------------------------------------------------------------------------------|
| Journal:                        | <i>BMJ Open</i>                                                                                                                                                                                                                                                                                                                                                                                                                                                                                                                                                                                                                                                                                                                                                                                                                                                                                                                                                                                                                                                                                  |
| Manuscript ID                   | bmjopen-2017-021222.R2                                                                                                                                                                                                                                                                                                                                                                                                                                                                                                                                                                                                                                                                                                                                                                                                                                                                                                                                                                                                                                                                           |
| Article Type:                   | Research                                                                                                                                                                                                                                                                                                                                                                                                                                                                                                                                                                                                                                                                                                                                                                                                                                                                                                                                                                                                                                                                                         |
| Date Submitted by the Author:   | 29-Apr-2018                                                                                                                                                                                                                                                                                                                                                                                                                                                                                                                                                                                                                                                                                                                                                                                                                                                                                                                                                                                                                                                                                      |
| Complete List of Authors:       | Miller, Paul; Anthony Nolan Trust, Anthony Nolan Research Institute<br>Forster, Alice; UCL, Research Department of Behavioural Science and Health<br>de Silva, Thushan; Sheffield Teaching Hospitals NHS Foundation Trust, Department of Infection and Tropical Medicine<br>Leonard, Hayley; Anthony Nolan Trust, Anthony Nolan Research Institute<br>Anthias, Chloe; Anthony Nolan Trust, Anthony Nolan Research Institute;<br>Royal Marsden Hospital Sutton, Department of Haemato-Oncology<br>Mayhew, Michaela; St George's NHS Foundation Trust, Department of Haematology<br>Klammer, Matthias; St George's NHS Foundation Trust, Department of Haematology<br>Paskar, Susan; Freeman Hospital, Northern Centre for Cancer Care<br>Hurst, Erin; Freeman Hospital, Northern Centre for Cancer Care<br>Peggs, Karl; University College London Hospitals NHS Foundation Trust, Department of Clinical Haematology<br>Madrigal, Alejandro; Anthony Nolan Trust, Anthony Nolan Research Institute<br>Snowden, John; Sheffield Teaching Hospitals NHS Foundation Trust, Department of Haematology |
| <b>Primary Subject Heading</b>: | Haematology (incl blood transfusion)                                                                                                                                                                                                                                                                                                                                                                                                                                                                                                                                                                                                                                                                                                                                                                                                                                                                                                                                                                                                                                                             |
| Secondary Subject Heading:      | Public health                                                                                                                                                                                                                                                                                                                                                                                                                                                                                                                                                                                                                                                                                                                                                                                                                                                                                                                                                                                                                                                                                    |
| Keywords:                       | Influenza, Inactivated influenza vaccine, Bone marrow transplantation < HAEMATOLOGY, Adult oncology < ONCOLOGY, PUBLIC HEALTH, Respiratory infections < THORACIC MEDICINE                                                                                                                                                                                                                                                                                                                                                                                                                                                                                                                                                                                                                                                                                                                                                                                                                                                                                                                        |
|                                 |                                                                                                                                                                                                                                                                                                                                                                                                                                                                                                                                                                                                                                                                                                                                                                                                                                                                                                                                                                                                                                                                                                  |

SCHOLARONE™  
Manuscripts

1  
2  
3 1 Sociodemographic and psychological determinants of influenza vaccine intention  
4  
5 2 amongst recipients of autologous and allogeneic haematopoietic stem cell  
6  
7 3 transplant: a cross-sectional survey of UK transplant recipients using a modified  
8  
9 4 health belief model.  
10  
11  
12  
13

14 6 Paul D E Miller MRCP<sup>1\*</sup> pauldemiller@doctors.org.uk, Alice S Forster PhD<sup>2</sup>, Thushan I  
15  
16 7 de Silva PhD<sup>3</sup>, Hayley Leonard BSc<sup>1</sup>, Chloe Anthias MD<sup>1,4</sup>, Michaela Mayhew MSc<sup>5</sup>,  
17  
18 8 Matthias Klammer MD<sup>5</sup>, Susan Paskar BSc<sup>6</sup>, Erin Hurst FRCPath<sup>6</sup>, Karl Peggs PhD<sup>7</sup>,  
19  
20  
21 9 Alejandro Madrigal PhD<sup>1</sup>, John A Snowden MD<sup>8</sup>  
22  
23  
24  
25

26 11 <sup>1</sup>Anthony Nolan Research Institute, Royal Free Hospital, Pond Street, London, NW3  
27  
28 12 2QU, United Kingdom, pauldemiller@doctors.org.uk, t 020 7284 8278  
29

30 13 <sup>2</sup> Research Department of Behavioural Science and Health, University College  
31  
32 14 London, London, United Kingdom  
33  
34

35 15 <sup>3</sup>Department of Infection and Tropical Medicine, Sheffield Teaching Hospitals NHS  
36  
37 16 Foundation Trust, Sheffield, United Kingdom  
38

39 17 <sup>4</sup>Department of Haemato-Oncology, Royal Marsden NHS Foundation Trust, London,  
40  
41 18 United Kingdom  
42  
43

44 19 <sup>5</sup> Department of Haematology, St George's NHS Foundation Trust, London, United  
45  
46 20 Kingdom  
47

48 21 <sup>6</sup> Northern Centre for Cancer Care, Freeman Hospital, Newcastle upon Tyne, United  
49  
50 22 Kingdom  
51  
52

53 23 <sup>7</sup>Department of Clinical Haematology, University College London Hospitals NHS  
54  
55 24 Foundation Trust, London, United Kingdom  
56  
57  
58  
59  
60

1  
2  
3 25 <sup>8</sup>Department of Clinical Haematology, Sheffield Teaching Hospitals NHS Foundation  
4  
5 26 Trust, Sheffield

6  
7 27

8  
9 28 \*Corresponding Author

10  
11  
12 29

13  
14 30 This work was supported by the Anthony Nolan Research Institute (No grant  
15  
16 31 number).

17  
18 32 Alice Forster is funded by Cancer Research UKC49896/A17429

19  
20  
21 33

22  
23 34 The authors have no competing interests to declare

24  
25  
26 35

27  
28 36 Abstract

29  
30  
31 37

32  
33 38 Objectives: Studies exploring vaccination rates amongst haematopoietic stem cell  
34  
35 39 transplant (HSCT) recipients have focused on physician factors that limit uptake.

36  
37 40 Understanding the patient factors that determine vaccination intention is crucial to  
38  
39 41 delivering a successful vaccination programme. Using a modified Health Belief

40  
41 42 Model (mHBM), we conducted a cross-sectional survey with the objective of  
42  
43 43 exploring the sociodemographic and psychological factors that determined

44  
45 44 autologous and allogeneic HSCT recipients' intention to receive the seasonal  
46  
47 45 inactivated influenza vaccine (SIIV) during the 2015-2016 influenza season.

48  
49  
50  
51 46

52  
53 47 Setting: The setting of our study was three tertiary-level, UK NHS autologous and  
54  
55 48 allogeneic HSCT centres.

1  
2  
3 49

4  
5 50 Participants: Eligible patients were aged 16 years or over and recipients of  
6  
7 51 autologous or allogeneic HSCT for any disease indication, with no absolute  
8  
9 52 contraindication to receiving the SIIV during the next influenza season, and having  
10  
11 53 not received the SIIV since transplant. 93 participants from 3 UK NHS HSCT centres  
12  
13  
14 54 completed an anonymous study-specific questionnaire. 78.5% were recipients of  
15  
16 55 allogeneic and 21.5% autologous HSCT.

17  
18  
19 56

20  
21 57 Results: 23.7% of participants expressed low intent to receive the SIIV. patients aged  
22  
23 58 over 65 (OR 0.02, 95% CI 0.01-0.57, p=0.02) and those who had not received the SIIV  
24  
25 59 prior to HSCT (OR 0.04, 0.02-0.56, p=0.02) were less likely to have high intent. A  
26  
27 60 multivariate logistic regression model incorporating constructs of the mHBM was  
28  
29 61 statistically significant (p<0.001) and explained 74.7% of variation in SIIV intention.  
30  
31 62 More patients felt that a recommendation from their HSCT team than their General  
32  
33 63 Practitioner would prompt them to receive the SIIV, and this was most pronounced  
34  
35 64 in those who had low intent.

36  
37  
38  
39 65

40  
41 66 Conclusions: The mHBM may provide a useful structure for addressing low vaccine  
42  
43 67 intent amongst HSCT recipients and further interventional studies are warranted.  
44  
45 68 We would encourage HSCT and General practitioners to discuss SIIV intention as a  
46  
47 69 routine part of care.

48  
49  
50  
51 7052  
53 71 HRA REC reference 16/WM/014454  
55 72



1  
2  
3 73 Strengths of Study  
4

5 74  
6

7 75 - The study questionnaire was based on the established theoretical framework of the  
8  
9  
10 76 Health Belief Model, and questions were specific with regard to vaccine and 2015-  
11  
12 77 2016 season.  
13

14 78  
15

16 79 -Participants from 3 geographically dispersed study sites completed anonymous  
17  
18  
19 80 questionnaires  
20

21 81  
22

23 82 Limitations  
24

25  
26 83 -The study explored intention to receive the inactivated influenza vaccine during the  
27  
28 84 2015-2016 influenza season. Uptake was not assessed and may differ from intention  
29  
30 85 rates.  
31

32 86  
33

34  
35 87 -The number of enrolled participants expressing low vaccination intent was small at  
36  
37 88 22 (23.7%) and this may bias our data.  
38

39 89  
40

41  
42 90 -The study did not include a qualitative component and there may be additional  
43  
44 91 determinants of influenza vaccine intention not captured here.  
45

46 92  
47

48 93  
49

50  
51 94 Introduction  
52

53 95  
54  
55  
56  
57  
58  
59  
60

1  
2  
3 96 Innate and adaptive immune responses are impaired for months to years following  
4  
5 97 autologous and allogeneic haematopoietic stem cell transplant (HSCT). Immune  
6  
7 98 impairment following autologous HSCT is secondary to the administration of  
8  
9 99 immunosuppressive conditioning regimens. In the setting of allogeneic HSCT,  
10  
11  
12 100 chronic graft versus host disease (GvHD) may also contribute to immune impairment  
13  
14 101 and dysfunction through thymic atrophy [1,2] and functional hyposplenism [3], and  
15  
16 102 the mainstay of GvHD treatment is immunosuppressive therapy. Infection is  
17  
18 103 therefore an important complication of both autologous and allogeneic HSCT, and  
19  
20  
21 104 recipients are at high risk of morbidity and mortality from influenza viruses[4–6].  
22  
23 105 Guidelines recommend that the seasonal inactivated influenza vaccine (SIIV) is  
24  
25 106 administered annually starting 4 to 6 months post HSCT [7,8], including patients with  
26  
27  
28 107 GvHD[9] While the SIIV is recommended by 96% of UK NHS allogeneic HSCT  
29  
30  
31 108 programmes[8], uptake rates of only 60-70% in the first 2 years post HSCT have been  
32  
33 109 reported amongst UK HSCT recipients[10,11]. The majority of UK allogeneic HSCT  
34  
35 110 recipients are referred to their General Practitioner (GP) with only 8% of UK adult  
36  
37 111 allogeneic HSCT programmes offering vaccination services. SIIV efficacy of 65.4-80%  
38  
39 112 has been reported in HSCT recipients, although in small cohorts [12,13] In both the  
40  
41  
42 113 UK and USA, physicians' familiarity with current guidelines, and perception of GvHD  
43  
44 114 as a contraindication to vaccination have been identified as factors limiting vaccine  
45  
46 115 uptake rates[10,11,14]. No studies to-date have explored the patient factors that  
47  
48  
49 116 influence SIIV hesitancy or intention in an HSCT recipient population.  
50  
51 117  
52  
53 118 The Health Belief Model (HBM) is a widely used framework for investigating  
54  
55 119 psychosocial determinants of health behaviours[15] and is recognized as an

1  
2  
3 120 important predictor of influenza vaccination uptake[16]. The HBM proposes that an  
4  
5 121 individual's engagement in a specific preventative health behaviour is predicated on  
6  
7 122 the following constructs: i) perceived susceptibility to the illness, ii) perceived  
8  
9 123 likelihood of contracting the illness, iii) perceived seriousness of the illness, iv)  
10  
11 124 perceived barriers to engaging in the health behaviour, v) perceived benefits of the  
12  
13 125 health behaviour, vi) cues to engage in the health behaviour such as advice from a  
14  
15 126 healthcare practitioner and, vii) self-efficacy or the individual's perception of their  
16  
17 127 capability to engage or succeed in the behaviour. Additional emotional constructs  
18  
19 128 may modify the HBM. In particular, worry may modify the impact of perceived risk  
20  
21 129 of illness; a patient may perceive themselves to be at risk, but unless this is  
22  
23 130 something that worries them they may not engage in a preventative behaviour[17].  
24  
25  
26 131 Furthermore, anticipated regret of illness if a health behaviour is not performed is  
27  
28 132 also recognized as a predictor of intent[18].  
29  
30  
31  
32  
33  
34

35 134 The objective of this study was to explore the sociodemographic factors, and the  
36  
37 135 vaccine and vaccination-specific health-beliefs that are associated with SIIV intention  
38  
39 136 amongst HSCT recipients, using a HBM modified with the additional emotional  
40  
41 137 constructs given above (mHBM). A better understanding of such associations may  
42  
43 138 allow development of targeted strategies that address issues specific to this unique  
44  
45 139 and complex patient group, with the aim of increasing influenza vaccine uptake  
46  
47 140 rates.  
48  
49

50  
51 141

52  
53 142 Participants and Methods  
54

55 143  
56  
57  
58  
59  
60

1  
2  
3 144 *Participants*  
4

5 145  
6

7 146 Patients were screened by HSCT nurse specialists for study eligibility during routine  
8

9  
10 147 outpatient appointments between June and September 2016. Participants were  
11

12 148 recruited from 3 study sites to reduce geographical bias. Eligible patients were aged  
13

14 149 16 years or over and recipients of autologous or allogeneic HSCT for any disease  
15

16 150 indication, with no absolute contraindication to receiving the SIIV during the next  
17

18 151 influenza season, and having not received the SIIV since transplant. All participants  
19

20  
21 152 gave written informed consent. The study was approved by the Health Research  
22

23 153 Authority National Research Ethics Committee (Reference 16/WM/0144)  
24

25  
26 154  
27

28 155 *Study Questionnaire and Health Belief Model*  
29

30 156  
31

32 157 Participants completed a study-specific, 42-item, paper-based questionnaire. The  
33

34 158 questionnaire was completed anonymously and returned in sealed envelopes, so  
35

36 159 participants felt free to express their belief without influence from their healthcare  
37

38 160 team.  
39

40  
41  
42 161  
43

44 162 Questions scoped type of HSCT (autologous or allogeneic), disease indication, time  
45

46 163 from HSCT, pre-HSCT SIIV receipt, and receipt of non-SIIV vaccines since HSCT.  
47

48 164 Sociodemographic questions established age, gender, ethnic background,  
49

50  
51 165 educational attainment, relationship status and residential circumstances.  
52

53 166  
54  
55  
56  
57  
58  
59  
60

1  
2  
3 167 Intention to receive the SIIV during the 2016-2017 influenza season, was assessed by  
4  
5 168 2 statements phrased in the affirmative (I intend to receive the flu vaccine next  
6  
7 169 winter) and negative (I will choose not to receive the flu vaccine next winter).  
8  
9  
10 170 Participants' agreement with each statement was expressed on 5-point Likert scales  
11  
12 171 ranging from strongly disagree to strongly agree.

13  
14 172  
15  
16 173 24 health belief statements were mapped to the mHBM with between 2 and 5  
17  
18 174 statements clustered around each construct (Table 1). Statements pertaining to the  
19  
20 175 cues to vaccination construct were phrased to explore perception of HSCT team and  
21  
22 176 GP knowledge of SIIV in the context of HSCT. Participants' perceived impact of a  
23  
24 177 recommendation to receive the SIIV from their HSCT team or GP was explored.  
25  
26 178 Statements about preferred vaccination location and ease of access to services were  
27  
28 179 also included. Again, participants' agreement with each statement was expressed on  
29  
30 180 5-point Likert scales ranging from strongly disagree to strongly agree.  
31  
32  
33  
34

35 181

### 36 182 *Statistical Analysis*

37 183

38 184 Statistical analysis was performed with IBM SPSS version 24.  
39  
40  
41  
42  
43  
44

45 185

46 186 For the dependent variable vaccination intention, participants' agreement scores  
47  
48 187 were summed and dichotomised to a 'high intent' group (intention score > than  
49  
50 188 neutral value) and a 'low intent' group (intention score  $\leq$  to the neutral value).  
51  
52

53 189  
54  
55  
56  
57  
58  
59  
60

1  
2  
3 190 Categorical patient characteristics and sociodemographic factors are reported as  
4  
5 191 frequencies and percentages. Associations between these variables and SIV  
6  
7 192 intention was examined with Pearson's chi-squared test, and Fisher's exact test  
8  
9 193 when expected values were less than 5.  
10  
11  
12 194  
13  
14 195 Internal scale reliability for each cluster of mHBM construct statements was assessed  
15  
16 196 using Cronbach's  $\alpha$ . A value of  $>0.6$  was considered indicative of  
17  
18  
19  
20  
21  
22  
23  
24  
25  
26  
27  
28  
29  
30  
31  
32  
33  
34  
35  
36  
37  
38  
39  
40  
41  
42  
43  
44  
45  
46  
47  
48  
49  
50  
51  
52  
53  
54  
55  
56  
57  
58  
59  
60

197 *Table 1: Health belief statements grouped by construct with associated Cronbach's Alpha Value*

198

| <b>Health Belief Model Construct (Cronbach's Alpha)</b>                                                                                                            |
|--------------------------------------------------------------------------------------------------------------------------------------------------------------------|
| <b>1. Susceptibility to seasonal influenza (<math>\alpha = 0.83</math>)</b>                                                                                        |
| Now I have had a stem cell transplant I can catch the seasonal flu more easily than other people my age                                                            |
| Now I have had a stem cell transplant I can catch the seasonal flu more easily than before my transplant                                                           |
| <b>2. Likelihood of catching seasonal influenza (<math>\alpha = 0.91</math>)</b>                                                                                   |
| My chances of catching seasonal flu next winter will be high if I do not receive the seasonal flu vaccine                                                          |
| I am more likely than other people my age to catch seasonal flu next winter if I do not receive the seasonal flu vaccine                                           |
| Now I have had a stem cell transplant it is more likely that I will catch seasonal flu next winter if I do not receive the seasonal flu vaccine                    |
| <b>3. Severity of seasonal influenza infection (<math>\alpha = 0.91</math>)</b>                                                                                    |
| If I do not receive the seasonal flu vaccine and caught the seasonal flu next winter this would be a serious illness for me                                        |
| If I do not receive the seasonal flu vaccine and caught the seasonal flu next winter this would have a negative impact on my recovery from my stem cell transplant |
| If I do not receive the seasonal flu vaccine and caught the seasonal flu next winter I would become more unwell than other people my age                           |
| <b>4. Barriers to vaccination (<math>\alpha = 0.84</math>)</b>                                                                                                     |
| I am worried about side effects of the seasonal flu vaccine                                                                                                        |
| If I receive the seasonal flu vaccine next winter it may make me feel unwell with the flu or a flu-like illness                                                    |
| If I receive the seasonal flu vaccine next winter I am more likely to experience side effects than other people my age                                             |
| If I receive the seasonal flu vaccine next winter it may have a negative impact on my recovery from my stem cell transplant                                        |
| Now I have had a stem cell transplant the seasonal flu vaccine may not work as well for me as it does for other people my age                                      |
| <b>5. Benefits of vaccination (<math>\alpha = 0.66</math>)</b>                                                                                                     |
| If I receive the seasonal flu vaccine next winter it may help to prevent me from catching the seasonal flu                                                         |
| If I receive the seasonal flu vaccine next winter it may help to prevent me from passing the seasonal flu to other people around me                                |
| If I receive the seasonal flu vaccine next winter, but still catch the flu, it may help to prevent me from becoming seriously unwell                               |
| <b>6. Cues to vaccination (<math>\alpha = 0.76</math>)</b>                                                                                                         |

1  
2  
3  
4  
5  
6  
7 If my transplant team advised me to receive the seasonal flu vaccine next winter I would definitely have it

8 If my GP advised me to receive the seasonal flu vaccine next winter I would definitely have it

9 My GP understands my condition enough to know if the seasonal flu vaccine is right for me

10 My transplant team understand my condition enough to know if the seasonal flu vaccine is right for me

---

11 7.Worry ( $\alpha = 0.47$ )

---

12 If I receive the seasonal flu vaccine next winter I will worry less about catching the seasonal flu

13 The thought of catching seasonal flu next winter worries me

---

14 8.Self-efficacy ( $\alpha = 0.29$ )

---

15 I have enough information and am able to decide whether the seasonal flu vaccine is right for me

16 I would find it easy to attend my GP surgery next winter to receive the seasonal flu vaccine

---

17 9.Anticipated regret ( $\alpha = 0.15$ )

---

18 I would regret it if I decided not to receive the seasonal flu vaccine next winter and became unwell with seasonal flu

19 I would regret it if I decided to receive the seasonal flu vaccine next winter and became unwell with side effects

---



1  
2  
3 199 acceptable internal scale reliability [19]. Scale reliability was acceptable for  
4  
5 200 constructs 1-6 (Table 1) and statement scores were summed to give total construct  
6  
7 201 scores for each participant. Scale reliability was unacceptable for constructs 7-9  
8  
9 202 (Table 1) therefore statements were analysed individually. All construct scores were  
10  
11 203 analysed as continuous scales, with zero representing a neutral response (neither  
12  
13 204 agree nor disagree). Mean agreement scores for low and high intent groups are  
14  
15 205 presented with 95% confidence intervals.  
16  
17  
18  
19  
20

21 207 Participants' mean agreement scores for each mHBM construct were compared  
22  
23 208 between SIIV intention groups using Analysis of Variance (ANOVA). Homogeneity of  
24  
25 209 variances was confirmed with Levene's statistic. HSCT team and GP cue scores  
26  
27 210 *within* low and high intent groups were compared with a paired sample T-Test.  
28  
29

30 211  
31  
32 212 The impact of sociodemographic variables and health belief constructs on seasonal  
33  
34 213 influenza vaccination intention was examined with hierarchical binary logistic  
35  
36 214 regression. Variables and constructs that were statistically significant in univariate  
37  
38 215 analysis were included as separate regression blocks. Statistically significant  
39  
40 216 variables that improved the predictive value ( $p < 0.05$  for the regression block) were  
41  
42 217 included in the final model.  
43  
44  
45

46 218  
47  
48 219 The assumption of a linear relationship between each independent variable and log  
49  
50 220 of the outcome variable was tested and confirmed using the Box-Tidwell  
51  
52 221 procedure[20]. Multicollinearity across all constructs was assessed. No variance  
53  
54  
55  
56  
57  
58  
59  
60

1  
2  
3 222 inflation factor was greater than 10, and the mean of values was acceptable at

4  
5 223 1.92[21].

6  
7 224

8  
9 225 There were 10 missing data points from 6 participants across the study. These were

10  
11 226 all responses to mHBM statements from the high intent group. Summed agreement

12  
13 227 scores were not calculated for that participant for the affected HBM construct only.

14  
15 228

16  
17 229 *Patient and Public Involvement*

18  
19 230

20  
21 231 The study questionnaire was developed with the involvement of volunteers from the

22  
23 232 Anthony Nolan patients and families panel. Using an initial draft questionnaire,

24  
25 233 think-aloud sessions were conducted to ensure that the questionnaire was clear,

26  
27 234 easy to understand, that interpretation of each question was as intended, and that

28  
29 235 answers were consistent with the question asked. Volunteers were also asked for

30  
31 236 their overall feedback on the study questionnaire. The revised questionnaire was

32  
33 237 then piloted with volunteer patients who were asked to complete the questionnaire,

34  
35 238 keeping note of the time taken, and to highlight any questions that they had

36  
37 239 difficulty answering or otherwise found problematic. The questionnaires were all

38  
39 240 completed within 10 minutes and no participants reported difficulty or concerns

40  
41 241 about the questions. Results will be disseminated to study participants through

42  
43 242 their transplant teams, and made available to participants through open access

44  
45 243 publication.

46  
47 244

48  
49 245

246

247 Results

248

249 *Patient Characteristics*

250

251 Characteristics of 93 study participants are given in Table 2. 78.5% were recipients  
 252 of allogeneic HSCT and the most frequent disease indication was acute myeloid  
 253 leukaemia (AML) (28.0%). The majority (68.6%) were within the first 6 months post  
 254 HSCT. 40.9% of participants had received the SIIV before HSCT, and 4.3% had  
 255 received a non-influenza vaccine since HSCT. 52.7% of participants were male, and  
 256 most (84.9%) were of a white ethnic group.

257

258 *SIIV vaccination intention for 2016-2017 influenza season*

259

260 71 (76.3%) participants expressed high SIIV intent, while 22 (23.7%) expressed low  
 261 SIIV intent.

262

263

264 *Table 2: Characteristics of n=93 study participants. \*Statistically Significant (p<0.05)*

265

| Characteristic, n=93 | n(%)      | high SIIV Intent<br>n(%) | p    |
|----------------------|-----------|--------------------------|------|
| <b>Gender</b>        |           |                          |      |
| Male                 | 49 (52.7) | 40 (81.6)                |      |
| Female               | 44 (47.3) | 31 (70.5)                | 0.23 |
| <b>Age group</b>     |           |                          |      |
| 16-34                | 22 (23.7) | 15 (68.2)                |      |

|    |                                        |           |           |       |
|----|----------------------------------------|-----------|-----------|-------|
| 1  |                                        |           |           |       |
| 2  |                                        |           |           |       |
| 3  | 35-54                                  | 36 (38.7) | 33 (91.7) |       |
| 4  | 55-64                                  | 20 (21.5) | 15 (75)   |       |
| 5  | 65+                                    | 15 (16.1) | 8 (53.5)  | 0.02* |
| 6  | <b>HSCT Type</b>                       |           |           |       |
| 7  | Allogeneic                             | 73 (78.5) | 59 (80.8) |       |
| 8  | Autologous                             | 20 (21.5) | 15 (75)   | 0.78  |
| 9  |                                        |           |           |       |
| 10 | <b>Disease Indication</b>              |           |           |       |
| 11 | Acute lymphoblastic leukaemia (ALL)    | 11 (11.8) | 8(72.7)   |       |
| 12 | Acute myeloid leukaemia (AML)          | 26 (28.0) | 20 (76.9) |       |
| 13 | Aplastic Anaemia (AA)                  | 5 (5.4)   | 3 (60)    |       |
| 14 | Chronic myeloid leukaemia (CML)        | 5 (5.4)   | 5 (100)   |       |
| 15 | Hodgkin Lymphoma                       | 9 (9.7)   | 9 (88.9)  |       |
| 16 | Myelodysplastic syndrome (MDS)         | 5 (5.4)   | 3 (60)    |       |
| 17 | Myelofibrosis (MF)                     | 2 (2.2)   | 1 (50)    |       |
| 18 | Multiple myeloma (MM)                  | 22 (23.7) | 17 (77.3) |       |
| 19 | Non-Hodgkin Lymphoma (NHL)             | 8 (8.6)   | 6 (75)    | 0.79  |
| 20 |                                        |           |           |       |
| 21 | <b>months from HSCT</b>                |           |           |       |
| 22 | 0-6                                    | 64 (68.8) | 52 (81.3) |       |
| 23 | >6-12                                  | 20 (21.5) | 14 (70)   |       |
| 24 | > 12                                   | 9 (9.7)   | 5 (55.6)  | 0.18  |
| 25 |                                        |           |           |       |
| 26 | <b>SIIV before HSCT</b>                |           |           |       |
| 27 | Yes                                    | 38 (40.9) | 34(89.5)  |       |
| 28 | No                                     | 55 (59.1) | 37 (67.3) | 0.01* |
| 29 |                                        |           |           |       |
| 30 | <b>Any non-SIIV vaccine since HSCT</b> |           |           |       |
| 31 | Yes                                    | 4 (4.3)   | 4 (100)   |       |
| 32 | No                                     | 89 (95.7) | 67 (75.3) | 0.26  |
| 33 |                                        |           |           |       |
| 34 | <b>Ethnicity</b>                       |           |           |       |
| 35 | White                                  | 79 (84.9) | 69 (77.2) |       |
| 36 | Asian                                  | 8 (8.6)   | 7 (87.5)  |       |
| 37 | Black                                  | 3 (3.2)   | 2 (66.7)  |       |
| 38 | Mixed                                  | 2 (2.2)   | 1 (50)    |       |
| 39 | Other                                  | 1 (1.1)   | 0 (0)     | 0.32  |
| 40 |                                        |           |           |       |
| 41 | <b>Educational Background</b>          |           |           |       |
| 42 | Higher Education                       | 30 (32.3) | 24 (80)   |       |
| 43 | Secondary Education                    | 49 (52.7) | 40 (81.6) |       |
| 44 | Other                                  | 3 (3.2)   | 2 (66.7)  |       |
| 45 | Prefer not to answer                   | 11 (11.8) | 5 (45.5)  | 0.07  |
| 46 |                                        |           |           |       |
| 47 | <b>Living Circumstances</b>            |           |           |       |
| 48 | Renting                                | 25 (26.9) | 33 (76)   |       |
| 49 | Home Owner                             | 54 (58.1) | 43 (79.6) |       |
| 50 | Other                                  | 10 (10.8) | 7(70)     |       |
| 51 | Prefer not to answer                   | 4 (4.7)   | 2 (50)    | 0.56  |
| 52 |                                        |           |           |       |
| 53 | <b>Relationship Status</b>             |           |           |       |
| 54 | Single                                 | 23 (24.7) | 18 (78.3) |       |
| 55 | Married / Cohabiting                   | 56(60.2)  | 45 (80.4) |       |
| 56 | Divorced / Separated                   | 10 (10.8) | 5 (50)    |       |
| 57 |                                        |           |           |       |
| 58 |                                        |           |           |       |
| 59 |                                        |           |           |       |
| 60 |                                        |           |           |       |



289

290 In univariate analysis, comparing mean construct agreement scores between SIV

291 intention groups, participants in the high intent group perceived greater

292 susceptibility to influenza, a greater likelihood of contracting influenza and

293 perceived influenza to be a more severe illness (Table 3). They also perceived

294 greater potential benefit from vaccination, and fewer barriers to vaccination.

295 Although the two groups expressed similar levels of worry about catching influenza,

296 participants in the high intent group felt they would worry less about catching

297 influenza if vaccinated compared with the low intent group. They also expressed

298 greater concern about anticipated regret if they caught influenza having not been

299 vaccinated. Level of anticipated regret of experiencing side effects if vaccinated was

300 similarly low across the two groups. Participants in the high intent group felt more

301 strongly that they had enough information to make decisions about vaccination and

302 that it would be easy to attend their general practice surgery for vaccination.

303

304

305

306

307

308

309

310

311

312

313 *Table 3: Mean agreement score values for health belief constructs for low and high*  
 314 *SIIV intent groups. <sup>a</sup>n=68, <sup>b</sup>n=69, <sup>c</sup>n=70*

| Health Belief Model Construct                       | Low SIIV Intent<br>(n=22) | High SIIV intent<br>(n=71)          | p      |
|-----------------------------------------------------|---------------------------|-------------------------------------|--------|
| 1. Susceptibility to seasonal influenza             | 0.05 (-0.70 to 0.70)      | 2.09 (1.75 to 4.39)                 | <0.001 |
| 2. Likelihood of catching seasonal influenza        | -0.45 (-1.39 to 0.40)     | 2.58 (2.00 to 3.18) <sup>b</sup>    | <0.001 |
| 3. Severity of Seasonal influenza infection         | 0.77 (-0.17 to 1.72)      | 2.65 (2.09 to 3.23) <sup>b</sup>    | 0.002  |
| 4. Barriers to vaccination                          | 1.27 (0.11 to 2.44)       | -1.55 (-2.34 to -0.80) <sup>a</sup> | 0.001  |
| 5. Benefits of vaccination                          | -0.05 (0.00 to 1.78)      | 2.56 (2.13 to 3.00)                 | <0.001 |
| 6. Cues to Vaccination                              |                           |                                     |        |
| HSCT team understands my condition                  | 1.14 (0.55 to 1.32)       | 1.63 (1.52 to 1.75)                 | <0.001 |
| GP understands my condition                         | -0.32 (0.83 to 0.13)      | 0.59 (0.55 to 0.83) <sup>c</sup>    | <0.001 |
| 7. Worry                                            |                           |                                     |        |
| About catching influenza                            | 0.14 (-0.43 to 0.71)      | 0.39 (0.17 to -0.63)                | 0.34   |
| Less about catching influenza if vaccinated         | -0.23 (0.60 to 0.07)      | 0.80 (0.61 to 1.00)                 | <0.001 |
| 8. Self-efficacy                                    |                           |                                     |        |
| Have enough information to decide about vaccination | 0.14 (-0.32 to 0.58)      | 0.81 (0.61 to 1.00)                 | 0.007  |
| Would find it easy to attend GP for vaccination     | 0.32 (-0.12 to 1.72)      | 1.10 (1.89 to 2.00)                 | <0.001 |
| 9. Anticipated regret                               |                           |                                     |        |
| of catching flu if not vaccinated                   | 0.27 (-0.21 to 0.74)      | 1.35 (1.18-1.52)                    | <0.001 |
| of side effects if vaccinated                       | -0.09 (-0.15 to 0.37)     | 0.13 (-0.12 to 0.39)                | 0.4    |

315

316 A multivariate regression model (Table 4) was statistically significant when compared  
 317 with a constant only model indicating that this set of variables and constructs  
 318 distinguishes reliably between HSCT recipients who express low and high SIIV intent.  
 319 There was a moderately strong relationship with 74.7% (Nagelkerke R<sup>2</sup>) of variation  
 320 in vaccination intention explained by the overall model. GP and HSCT Team cues to

1  
2  
3 321 vaccination, self-efficacy and anticipated regret constructs did not significantly  
4  
5 322 improve predictive value and so were not included in the final model. Age and pre-  
6  
7 323 HSCT SIV vaccination receipt remained independent predictors of SIV intention,  
8  
9 324 with those aged >65 and those who had not received SIV before HSCT more likely to  
10  
11 325 be in the low intent group. A greater perceived benefit of vaccination was the  
12  
13 326 strongest predictor of being in the high intent group. Although the constructs  
14  
15 327 susceptibility to influenza, likelihood of contracting influenza, severity of influenza  
16  
17 328 infection, barriers to vaccination and worry about catching influenza improved the  
18  
19 329 predictive value of the overall multivariate model, they did not independently  
20  
21 330 predict vaccination intention.  
22  
23  
24  
25  
26  
27  
28  
29  
30  
31  
32  
33  
34  
35  
36  
37  
38  
39  
40  
41  
42  
43  
44  
45  
46  
47  
48  
49  
50

331

332

333

334

335

336

337

338

339

340

341

342 *Table 4 Multivariate logistic regression model predicting odds of high SIV intent.*343 *Overall model was statistically significant compared with a constant only model*344 *( $p < 0.001$ ). \*Statistically significant independent predictor ( $p < 0.05$ )*



345

| Variable                                                   | Odds Ratio of high SIIV Intent (95% CI) | P     |
|------------------------------------------------------------|-----------------------------------------|-------|
| Age >65                                                    | 0.02 (0.01-0.57)                        | 0.02* |
| No SIIV before HSCT                                        | 0.04 (0.02-0.56)                        | 0.02* |
| Benefits of vaccination                                    | 2.96 (1.29-6.81)                        | 0.01* |
| Susceptibility to seasonal Influenza                       | 0.96 (0.33-2.78)                        | 0.64  |
| Likelihood of catching seasonal influenza                  | 1.68 (0.86-3.26)                        | 0.13  |
| Severity of seasonal influenza infection                   | 0.69 (0.39-1.21)                        | 0.20  |
| Barriers to vaccination                                    | 0.69 (0.57-0.99)                        | 0.05  |
| Worry less about catching seasonal influenza if vaccinated | 4.99 (1.01-24.77)                       | 0.05  |

346

347

348

349 *Cues to Vaccination and Preferred Vaccination Location*

350

351 Considering their HSCT team and GPs, both high and low intent groups agreed more  
 352 strongly with statements that their HSCT team understands their condition enough  
 353 to know if the influenza vaccine is right for them. Patients were also asked how  
 354 much they agreed with the statement that they would definitely have the vaccine if  
 355 their GP or HSCT team recommended it. Agreement scores were dichotomized to  
 356 low agreement ( $\leq$  neutral value) and high agreement ( $>$ neutral value). Of those 22  
 357 patients with low intent, 90% agreed that they would receive the vaccine if their  
 358 HSCT Team recommended it, and only 22.7% if their GP recommended it, compared  
 359 with 98.6% and 90.0% respectively in the high intent group.

360

1  
2  
3 361 Participant responses to the statement *I would prefer to have the seasonal influenza*  
4  
5 362 *vaccine next winter at my transplant centre instead of my GP surgery* were  
6  
7 363 categorized into prefers HSCT centre, prefers GP surgery or no preference. Of the  
8  
9 364 low intent group, over half (54.5%) favoured vaccination at their HSCT centre, with  
10  
11 365 only a minority (4.5%) favouring vaccination at their GP surgery. Of those with high  
12  
13 366 intent 43.7% favoured vaccination at their HSCT programme, compared with 29.6%  
14  
15 367 at their GP surgery although these findings did not reach statistical significance  
16  
17 368 (p=0.05).  
18  
19  
20  
21  
22

## 23 370 Discussion

24  
25  
26 371  
27  
28 372 This is the first study to explore sociodemographic factors and psychological  
29  
30 373 determinants of SIIV intention amongst HSCT recipients Approximately a quarter of  
31  
32 374 participants expressed low SIIV intent which is in keeping with previously reported  
33  
34 375 SIIV uptake rates of 60-70% [10,11] Participants' SIIV uptake during the 2016-2017  
35  
36 376 UK influenza season was not evaluated, and uptake in this cohort may not be  
37  
38 377 equivalent to intent rates reported here.  
39  
40  
41

42 378  
43  
44 379 Constructs of a mHBM were significant determinants of SIIV intention. Strategies  
45  
46 380 tailored to a population and their specific concerns are the most effective at  
47  
48 381 improving knowledge and changing attitudes towards vaccination, and increasing  
49  
50 382 vaccine uptake[22]. Based on our findings, the mHBM may provide a useful  
51  
52 383 framework for structuring strategies to address low SIIV intent in the HSCT  
53  
54 384 population. Exploring HSCT recipients increased risk of influenza, both in terms of  
55  
56  
57  
58  
59  
60

1  
2  
3 385 susceptibility and severity, discussing the potential benefits of vaccination, and  
4  
5 386 exploring concerns around side effects may help to promote vaccine intent and  
6  
7 387 uptake.  
8  
9 388  
10  
11 389 A strong association between past vaccination behaviours and future vaccination  
12  
13 390 intent has been reported[23]. Previous influenza vaccination has been associated  
14  
15 391 with high intent or uptake in all at risk groups [24,25] and cancer patients[26] and  
16  
17 392 our findings accord with this. It may therefore be helpful to explore recipients pre-  
18  
19 393 HSCT SIV behaviour and discussion rationale for refusal where appropriate.  
20  
21 394  
22  
23 395 It was reassuring to find that none of gender, ethnicity, educational background,  
24  
25 396 living circumstances or relationship status were associated with vaccine hesitancy in  
26  
27 397 this study. However, vaccination intention did vary with age. High intent was  
28  
29 398 greatest at 91.7% in the 35-53 age bracket, but of concern, fell in those over 65 to  
30  
31 399 53.5%, which is below the 2015-2016 uptake rate of 71% in the equivalent UK  
32  
33 400 general population age-group[27]. Older age has been reported as a barrier to  
34  
35 401 vaccination in a cohort of oncology patients, including some with haematological  
36  
37 402 malignancy [26]. However, a French study of patients with secondary  
38  
39 403 immunodeficiency, including haematological disorders, reported higher vaccination  
40  
41 404 rates in those aged over 65 compared with younger patients[28]. In a UK study, older  
42  
43 405 age was found to be a predictor of uptake of the 2009 pandemic influenza A vaccine  
44  
45 406 amongst high-risk adults[29]. A meta-analysis of international studies found  
46  
47 407 inconsistent association between age and vaccination intent and uptake in the  
48  
49 408 general public, older patients, and those with chronic disease [23]. It is not apparent  
50  
51  
52  
53  
54  
55  
56  
57  
58  
59  
60

1  
2  
3 409 from these studies why age impacts on intent, and there are likely to be a range of  
4  
5 410 social, psychological, financial and healthcare access issues specific to each study  
6  
7 411 population. Our findings highlight a specific age group in whom intent is low and  
8  
9 412 may benefit from targeted intervention. Further evaluation of this finding and  
10  
11 413 exploration of underlying determinants is warranted.  
12  
13

14 414  
15  
16 415 High SIIV intent was greatest in those recipients within the first 0-6 months' post-  
17  
18 416 HSCT (81.3%) and lowest at more than 12 months (55.6%) although this finding was  
19  
20 417 not statistically significant. Longer time from HSCT may be associated with a change  
21  
22 418 in perceived risk of infection, or concern about vaccine side effects or efficacy;  
23  
24 419 however, we did not detect any statistically significant difference in health beliefs at  
25  
26 420 0-6, 6-12 and > 12 months from HSCT. This finding suggests there is a need for  
27  
28 421 reinforcement of SIIV intent from healthcare professionals throughout and beyond  
29  
30 422 the first-year post HSCT.  
31  
32  
33  
34

35 423  
36  
37 424 In both vaccine intention groups, patients expressed greater confidence in their  
38  
39 425 HSCT team than their GP, with respect to understanding of whether the influenza  
40  
41 426 vaccine is right for them. Fewer patients felt that a recommendation from their GP  
42  
43 427 would prompt them to receive the SIIV compared with if their HSCT Team made the  
44  
45 428 recommendation. This was most marked in the low intent group. These findings  
46  
47 429 suggest that cues from the HSCT team are important in promoting vaccination  
48  
49 430 amongst HSCT recipients, and particularly for those with low intent. Cues from  
50  
51 431 healthcare providers are considered a key factor in promoting vaccination[23] and a  
52  
53 432 study of Israeli cancer patients identified recommendation from an oncologist as a  
54  
55  
56  
57  
58  
59  
60

1  
2  
3 433 significant predictor of vaccine uptake [26]. Our findings accord with this, and  
4  
5 434 suggest that HSCT recipients value the advice of their specialist team. This highlights  
6  
7 435 the importance of HSCT specialists engaging in discussion with patients about  
8  
9 436 influenza vaccination. Preference for vaccination at HSCT centre rather than GP  
10  
11 437 surgery was similar at 43.7% and 54.5% in low and high intent groups respectively. In  
12  
13 438 the high intent group, more patients expressed a preference for vaccination at their  
14  
15 439 GP surgery than in the low intent group. For approximately 50% of those HSCT  
16  
17 440 recipients with both low and high intent, access to an SIIV service at HSCT centres  
18  
19 441 may facilitate vaccination uptake  
20  
21 442  
22  
23 443 None of the transplant variables assessed were associated with SIIV intention.  
24  
25 444 Current influenza vaccination guidelines are standardized for all HSCT recipients as  
26  
27 445 evidence is insufficient to recommend modification according to donor type, stem  
28  
29 446 cell source or conditioning[7,30]. Influenza infections are reported to occur with  
30  
31 447 higher frequency in allogeneic compared with autologous HSCT recipients [31,32]  
32  
33 448 and may have a higher associated morbidity and mortality[33] although this latter  
34  
35 449 finding has not been consistently reported[4]. There was no difference in  
36  
37 450 vaccination intention between autologous and allogeneic HSCT recipients. This  
38  
39 451 suggests the unique aspects of allogeneic HSCT, principally GvHD and the need for  
40  
41 452 immunosuppressive therapy, do not contribute to increased influenza vaccination  
42  
43 453 intention in this group compared with autoHSCT recipients.  
44  
45 454  
46  
47  
48  
49  
50  
51  
52  
53 455 Strength and Weaknesses of the Study  
54  
55  
56 456  
57  
58  
59  
60

1  
2  
3 457 Our study was developed from an established theoretical framework for exploring  
4  
5 458 health beliefs. Think-aloud sessions and a pilot exercise ensured that the  
6  
7 459 questionnaire was easy to understand and acceptable to participants. By  
8  
9 460 completing the questionnaire anonymously, participants were encouraged to  
10  
11 461 respond according to their own beliefs without influence by their healthcare team.  
12  
13  
14 462 By recruiting from 3 study sites we sought to capture the beliefs of participants with  
15  
16 463 different experiences of post HSCT care, reduce the impact of geographical bias and  
17  
18 464 render our results more generalizable to the UK HSCT population. The study did not  
19  
20 465 include a qualitative component and there may be additional determinants of  
21  
22 466 influenza vaccine intention not captured here. Data on non-responders was not  
23  
24 467 captured and therefore we cannot exclude a participation bias. The small absolute  
25  
26 468 number of participants expressing low SIIV intent in our study may bias our data.  
27  
28  
29  
30  
31  
32  
33  
34

## 35 471 Conclusion

36  
37 472  
38  
39 473 Our data indicate that the constructs of a mHBM are important determinants of SIIV  
40  
41 474 intention in the HSCT recipient population. These constructs may be used to  
42  
43 475 develop interventions addressing low SIIV intent, for example, SIIV uptake amongst  
44  
45 476 HSCT recipients may be promoted by public health authorities and patient support  
46  
47 477 groups with messages adapted from our findings. Future prospective studies to  
48  
49 478 investigate the efficacy of such intervention are warranted. HSCT recipients strongly  
50  
51 479 value the expertise and recommendation of their transplant team, and we would  
52  
53 480 encourage practitioners to discuss SIIV intention with all patients as a routine and  
54  
55  
56  
57  
58  
59  
60

1  
2  
3 481 important aspect of post-transplant care. Furthermore, those aged over 65, and  
4  
5 482 those who had not received the SIIV prior to HSCT were particularly likely to have  
6  
7 483 low intent and may be target groups. Local provision of vaccination services at HSCT  
8  
9 484 centres may serve as an additional promoter for a proportion of patients and this  
10  
11 485 would require allocation of resources from health commissioners.  
12  
13

14 486

#### 16 487 Acknowledgements

17  
18  
19 488 The authors would like to thank the volunteers who contributed to the development  
20  
21 489 of the study questionnaire. The authors also wish to thank the stem cell transplant  
22  
23 490 recipients who participated in the study.  
24

25 491

#### 27 492 Authorship Statement

28 493

29  
30  
31  
32 494 Paul D E Miller, Alice S Forster, Thushan I de Silva, Karl Peggs, Alejandro Madrigal and  
33  
34 495 John A Snowden all contributed substantially to the design, analysis, and  
35  
36 496 interpretation of data. Hayley Leonard, Chloe Anthias, Michaela Mayhew, Matthias  
37  
38 497 Klammer, Erin Hurst and Susan Paskar all contributed substantially to the acquisition  
39  
40 498 of data. All authors contributed to drafting the work and/or revising it critically for  
41  
42 499 intellectual content. All authors gave final approval of the version to be published.  
43  
44

45 500

#### 47 501 Data sharing statement

48 502 No additional data available

49 503

#### 51 504 References

505

1 Dertschnig S, Hauri-Hohl MM, Vollmer M, *et al.* Impaired thymic  
2  
3  
4  
5 506 1  
6  
7 507 expression of tissue-restricted antigens licenses the de novo generation of  
8  
9  
10 508 autoreactive CD4+ T cells during murine acute GVHD. *Blood*  
11  
12 509 2015;**125**:2720–3. doi:10.1182/blood-2014-08-597245

13  
14 510 2  
15  
16 511 versus-host disease is effected by impaired cell cycle progression of host  
17  
18 512 pro-T and pre-T cells. *Blood* 2000;**90**:347–  
19  
20 513 54. [www.ncbi.nlm.nih.gov/pubmed/10891472](http://www.ncbi.nlm.nih.gov/pubmed/10891472)

21  
22  
23 514 3  
24  
25 515 allogeneic bone marrow transplantation. *J Clin Pathol* 1995;**48**:257–9.  
26  
27 516 doi:<http://dx.doi.org/10.1136/jcp.48.3.257>

28  
29 517 4  
30  
31 518 hematopoietic stem cell transplantation: risk factors, mortality, and the  
32  
33 519 effect of antiviral therapy. *Clin Infect Dis* 2004;**39**:1300–6.  
34  
35 520 doi:10.1086/425004

36  
37  
38 521 5  
39  
40 522 hospitalized adult bone marrow transplant recipients. *Bone Marrow*  
41  
42 523 *Transplant* 1994;**13**:437–40. [www.ncbi.nlm.nih.gov/pubmed/8019468](http://www.ncbi.nlm.nih.gov/pubmed/8019468)

43  
44  
45 524 6  
46  
47 525 viral infections in hematopoietic cell transplant recipients. 2012;**2**:203–18.  
48  
49 526 doi:<http://dx.doi.org/10.1093/cid/ciu623>

50  
51 527 7  
52  
53 528 for vaccination of the immunocompromised host. *Clin Infect Dis*  
54  
55 529 2014;**58**:1–57. doi:10.1093/cid/cit684



- 1  
2  
3 530 8 Miller PDE, de Silva TI, Skinner R, *et al.* Routine vaccination practice after  
4  
5 531 adult and paediatric allogeneic haematopoietic stem cell transplant: a  
6  
7 532 survey of UK NHS programmes. *Bone Marrow Transplant* 2017;**52**:775–7.  
8  
9 533 doi:10.1038/bmt.2016.362  
10  
11 534 9 Tomblyn M, Chiller T, Einsele H, *et al.* Guidelines for preventing infectious  
12  
13 535 complications among hematopoietic cell transplantation recipients: a  
14  
15 536 global perspective. *Biol Blood Marrow Transplant* 2009;**15**:1143–238.  
16  
17 537 doi:10.1016/j.bbmt.2009.06.019  
18  
19  
20 538 10 Leonard H, Anthias C. Improving the re-vaccination programme for  
21  
22 539 patients post allograft. *Bone Marrow Transplant* 2015;**50**:216–7.  
23  
24 540 doi:10.1038/sj.bmt.1703986  
25  
26  
27 541 11 Meiring J, de Silva TI, Snowden JA. A study of adherence to a vaccination  
28  
29 542 schedule following adult allogeneic haematopoietic stem cell transplants  
30  
31 543 in UK transplant centre. *Bone Marrow Transplant* 2015;**50**:s203–4.  
32  
33  
34 544 12 Ambati A, Boas LS V, Ljungman P, *et al.* Evaluation of pretransplant  
35  
36 545 influenza vaccination in hematopoietic SCT: A randomized prospective  
37  
38 546 study. *Bone Marrow Transplant* 2015;**50**:858–64.  
39  
40 547 doi:10.1038/bmt.2015.47  
41  
42  
43 548 13 Machado CM, Cardoso MR a, da Rocha IF, *et al.* The benefit of influenza  
44  
45 549 vaccination after bone marrow transplantation. *Bone Marrow Transplant*  
46  
47 550 2005;**36**:897–900. doi:10.1038/sj.bmt.1705159  
48  
49 551 14 Ariza-Heredia EJ, Gulbis AM, Stolar KR, *et al.* Vaccination guidelines after  
50  
51 552 hematopoietic stem cell transplantation: practitioners' knowledge,  
52  
53 553 attitudes, and gap between guidelines and clinical practice. *Transpl Infect*  
54  
55 554 *Dis* 2014;**16**:878–86. doi:10.1111/tid.12312  
56  
57  
58  
59  
60

- 1  
2  
3 555 15 Rosenstock IM. Why People Use Health Services. *Milbank Q* 1966;**44**:1107–  
4  
5 556 8. doi:<https://doi.org/10.1111/j.1468-0009.2005.00425.x>  
6  
7 557 16 Brewer NT, Chapman GB, Gibbons FX, *et al*. Meta-analysis of the  
8  
9 558 relationship between risk perception and health behavior: the example of  
10  
11 559 vaccination. *Health Psychol* 2007;**26**:136–45. doi:10.1037/0278-  
12  
13 560 6133.26.2.136  
14  
15  
16 561 17 Chapman GB, Coups EJ. Emotions and preventive health behavior: worry,  
17  
18 562 regret, and influenza vaccination. *Health Psychol* 2006;**25**:82–90.  
19  
20 563 doi:10.1037/0278-6133.25.1.82  
21  
22 564 18 Abraham C, Sheeran P. Acting on intentions: The role of anticipated regret.  
23  
24 565 *Br J Soc Psychol* 2003;**42**:495–511.  
25  
26 566 doi:<https://doi.org/10.1348/014466603322595248>  
27  
28 567 19 Panayides P. Coefficient Alpha: Interpret With Caution. *Eur J Psychol*  
29  
30 568 2013;**9**:687–96. doi:10.5964/ejop.v9i4.653  
31  
32 569 20 Box GEP, Tidwell PW. Transformation of the Independent Variables.  
33  
34 570 *Technometrics* 1962;**4**:531–50. doi:10.1080/00401706.1962.10490038  
35  
36 571 21 Field A. *Discovering Statistics Using IBM SPSS Statistics*. Fourth. Sage 2014.  
37  
38 572 22 Jarrett C, Wilson R, O’Leary M, *et al*. Strategies for addressing vaccine  
39  
40 573 hesitancy - A systematic review. *Vaccine* 2015;**33**:4180–90.  
41  
42 574 doi:10.1016/j.vaccine.2015.04.040  
43  
44 575 23 Schmid P, Rauber D, Betsch C, *et al*. Barriers of Influenza Vaccination  
45  
46 576 Intention and Behavior - A Systematic Review of Influenza Vaccine  
47  
48 577 Hesitancy, 2005 - 2016. *PLoS One* 2017;**12**:1–46.  
49  
50 578 doi:<http://dx.doi.org/10.1371/journal.pone.0170550>  
51  
52 579 24 Nagata JM, Hernández-Ramos I, Kurup a S, *et al*. Social determinants of  
53  
54  
55  
56  
57  
58  
59  
60

- 1  
2  
3 580 health and seasonal influenza vaccination in adults  $\geq 65$  years: A  
4  
5 581 systematic review of qualitative and quantitative data. *BMC Public Health*  
6  
7 582 2013;**13**:1–25. doi:http://dx.doi.org/10.1186/1471-2458-13-388  
8  
9 583 25 Yeung MPS, Lam FLY, Coker R. Factors associated with the uptake of  
10  
11 584 seasonal influenza vaccination in adults: a systematic review. *J Public*  
12  
13 585 *Health (Bangkok)* 2016;**38**:746–53. doi:10.1093/pubmed/fdv194  
14  
15 586 26 Vinograd I, Baslo R, Farbman L, *et al.* Factors associated with influenza  
16  
17 587 vaccination among adult cancer patients : a case – control study. *Clin*  
18  
19 588 *Microbiol Infect* 2014;**20**:899–905. doi:10.1111/1469-0691.12625  
20  
21 589 27 NHS England. The National Flu Immunisation Programme 2016/2017.  
22  
23 590 2016.https://www.gov.uk/government/uploads/system/uploads/attach  
24  
25 591 ment\_data/file/529954/Annual\_flu\_letter\_2016\_2017.pdf (accessed 22  
26  
27 592 Feb 2017).  
28  
29 593 28 Loubet P, Kernéis S, Groh M, *et al.* Attitude, knowledge and factors  
30  
31 594 associated with influenza and pneumococcal vaccine uptake in a large  
32  
33 595 cohort of patients with secondary immune deficiency. *Vaccine*  
34  
35 596 2015;**33**:3703–8. doi:10.1016/j.vaccine.2015.06.012  
36  
37 597 29 Myers LB, Goodwin R. Using a theoretical framework to determine adults’  
38  
39 598 intention to vaccinate against pandemic swine flu in priority groups in the  
40  
41 599 UK. *Public Health* 2012;**126**:S53–6. doi:10.1016/j.puhe.2012.05.024  
42  
43 600 30 Tomblyn M, Chiller T, Einsele H, *et al.* Guidelines for preventing infectious  
44  
45 601 complications among hematopoietic cell transplantation recipients: a  
46  
47 602 global perspective. Preface. *Bone Marrow Transplant* 2009;**15**:1143–238.  
48  
49 603 doi:10.1038/bmt.2009.254  
50  
51 604 31 Hassan I a, Chopra R, Swindell R, *et al.* Respiratory viral infections after  
52  
53  
54  
55  
56  
57  
58  
59

- 1  
2  
3 605 bone marrow/peripheral stem-cell transplantation: the Christie hospital  
4  
5 606 experience. *Bone Marrow Transplant* 2003;**32**:73–7.  
6  
7 607 doi:10.1038/sj.bmt.1704048  
8  
9 608 32 Ljungman P, Ward KN, Crooks BN a, *et al.* Respiratory virus infections after  
10  
11 609 stem cell transplantation : a prospective study from the Infectious  
12  
13 610 Diseases Working Party of the European Group for Blood and Marrow  
14  
15 611 Transplantation Summary : *Bone Marrow Transplant* 2001;**28**:479–84.  
16  
17 612 doi:http://dx.doi.org/10.1038/sj.bmt.1703139  
18  
19  
20 613 33 Martino R, Porras RP, Rabella N, *et al.* Prospective Study of the Incidence,  
21  
22 614 Clinical Features, and Outcome of Symptomatic Upper and Lower  
23  
24 615 Respiratory Tract Infections by Respiratory Viruses in Adult Recipients of  
25  
26 616 Hematopoietic Stem Cell Transplants for Hematologic Malignancies. *Biol*  
27  
28 617 *Blood Marrow Transpl* 2005;**11**:781–96.  
29  
30 618 doi:10.1016/j.bbmt.2005.07.007.Prospective  
31  
32  
33  
34 619  
35  
36 620  
37  
38  
39  
40  
41  
42  
43  
44  
45  
46  
47  
48  
49  
50  
51  
52  
53  
54  
55  
56  
57  
58  
59  
60

STROBE Statement—Checklist of items that should be included in reports of *cross-sectional studies*

|                              | Item No | Recommendation                                                                                                                                                                                                                                                                                                                                                                                                                                                           |
|------------------------------|---------|--------------------------------------------------------------------------------------------------------------------------------------------------------------------------------------------------------------------------------------------------------------------------------------------------------------------------------------------------------------------------------------------------------------------------------------------------------------------------|
| <b>Title and abstract</b>    | 1       | (a) Indicate the study's design with a commonly used term in the title or the abstract<br><a href="#">Abstract line 41-43</a><br>(b) Provide in the abstract an informative and balanced summary of what was done and what was found <a href="#">Abstract line 36-71</a>                                                                                                                                                                                                 |
| <b>Introduction</b>          |         |                                                                                                                                                                                                                                                                                                                                                                                                                                                                          |
| Background/rationale         | 2       | Explain the scientific background and rationale for the investigation being reported<br><a href="#">Introduction Line 103-141</a>                                                                                                                                                                                                                                                                                                                                        |
| Objectives                   | 3       | State specific objectives, including any prespecified hypotheses <a href="#">Introduction line 143-146</a>                                                                                                                                                                                                                                                                                                                                                               |
| <b>Methods</b>               |         |                                                                                                                                                                                                                                                                                                                                                                                                                                                                          |
| Study design                 | 4       | Present key elements of study design early in the paper <a href="#">Method Section</a>                                                                                                                                                                                                                                                                                                                                                                                   |
| Setting                      | 5       | Describe the setting, locations, and relevant dates, including periods of recruitment, exposure, follow-up, and data collection <a href="#">line 155-162</a>                                                                                                                                                                                                                                                                                                             |
| Participants                 | 6       | (a) Give the eligibility criteria, and the sources and methods of selection of participants <a href="#">line 157-160</a>                                                                                                                                                                                                                                                                                                                                                 |
| Variables                    | 7       | Clearly define all outcomes, exposures, predictors, potential confounders, and effect modifiers. Give diagnostic criteria, if applicable <a href="#">Line 169-188</a>                                                                                                                                                                                                                                                                                                    |
| Data sources/<br>measurement | 8*      | For each variable of interest, give sources of data and details of methods of assessment (measurement). Describe comparability of assessment methods if there is more than one group <a href="#">Line 169-188</a>                                                                                                                                                                                                                                                        |
| Bias                         | 9       | Describe any efforts to address potential sources of bias <a href="#">lines 157-158 and 168-170</a>                                                                                                                                                                                                                                                                                                                                                                      |
| Study size                   | 10      | Explain how the study size was arrived at <a href="#">N/A</a>                                                                                                                                                                                                                                                                                                                                                                                                            |
| Quantitative variables       | 11      | Explain how quantitative variables were handled in the analyses. If applicable, describe which groupings were chosen and why. <a href="#">Lines 197-199, 213-216</a>                                                                                                                                                                                                                                                                                                     |
| Statistical methods          | 12      | (a) Describe all statistical methods, including those used to control for confounding<br><a href="#">lines 218-229</a><br>(b) Describe any methods used to examine subgroups and interactions <a href="#">N/A</a><br>(c) Explain how missing data were addressed <a href="#">Lines 237-240</a><br>(d) If applicable, describe analytical methods taking account of sampling strategy<br><a href="#">N/A</a><br>(e) Describe any sensitivity analyses <a href="#">N/A</a> |
| <b>Results</b>               |         |                                                                                                                                                                                                                                                                                                                                                                                                                                                                          |
| Participants                 | 13*     | (a) Report numbers of individuals at each stage of study—eg numbers potentially eligible, examined for eligibility, confirmed eligible, included in the study, completing follow-up, and analysed. <a href="#">Line 264</a><br>(b) Give reasons for non-participation at each stage <a href="#">N/A</a><br>(c) Consider use of a flow diagram <a href="#">N/A</a>                                                                                                        |
| Descriptive data             | 14*     | (a) Give characteristics of study participants (eg demographic, clinical, social) and information on exposures and potential confounders <a href="#">Table 2</a><br>(b) Indicate number of participants with missing data for each variable of interest<br><a href="#">Table 3</a>                                                                                                                                                                                       |
| Outcome data                 | 15*     | Report numbers of outcome events or summary measures <a href="#">line 273-274</a>                                                                                                                                                                                                                                                                                                                                                                                        |
| Main results                 | 16      | (a) Give unadjusted estimates and, if applicable, confounder-adjusted estimates and their precision (eg, 95% confidence interval). Make clear which confounders were                                                                                                                                                                                                                                                                                                     |

|                          |    |                                                                                                                                                                                                           |
|--------------------------|----|-----------------------------------------------------------------------------------------------------------------------------------------------------------------------------------------------------------|
|                          |    | adjusted for and why they were included <a href="#">Table 3 and Table 4</a>                                                                                                                               |
|                          |    | (b) Report category boundaries when continuous variables were categorized <a href="#">Table 2</a>                                                                                                         |
|                          |    | (c) If relevant, consider translating estimates of relative risk into absolute risk for a meaningful time period <a href="#">N/A</a>                                                                      |
| Other analyses           | 17 | Report other analyses done—eg analyses of subgroups and interactions, and sensitivity analyses <a href="#">N/A</a>                                                                                        |
| <b>Discussion</b>        |    |                                                                                                                                                                                                           |
| Key results              | 18 | Summarise key results with reference to study objectives <a href="#">Line 380-382</a>                                                                                                                     |
| Limitations              | 19 | Discuss limitations of the study, taking into account sources of potential bias or imprecision. Discuss both direction and magnitude of any potential bias. <a href="#">Lines 385-393</a>                 |
| Interpretation           | 20 | Give a cautious overall interpretation of results considering objectives, limitations, multiplicity of analyses, results from similar studies, and other relevant evidence . <a href="#">Line 387-463</a> |
| Generalisability         | 21 | Discuss the generalisability (external validity) of the study results <a href="#">Line 486-489</a>                                                                                                        |
| <b>Other information</b> |    |                                                                                                                                                                                                           |
| Funding                  | 22 | Give the source of funding and the role of the funders for the present study and, if applicable, for the original study on which the present article is based – <a href="#">line 30-32</a>                |

\*Give information separately for exposed and unexposed groups.

**Note:** An Explanation and Elaboration article discusses each checklist item and gives methodological background and published examples of transparent reporting. The STROBE checklist is best used in conjunction with this article (freely available on the Web sites of PLoS Medicine at <http://www.plosmedicine.org/>, Annals of Internal Medicine at <http://www.annals.org/>, and Epidemiology at <http://www.epidem.com/>). Information on the STROBE Initiative is available at [www.strobe-statement.org](http://www.strobe-statement.org).
